1  
2  
3  
4  
5  
6  
7  
8  
9  
10  
11  
12  
13  
14  
15  
16  
17  
18  
19  
20  
21  
22  
23  
24  
25  
26  
27  
28  
29  
30  
31  
32  
33  
34  
35  
36  
37  
38  
39

## **Risky choice: probability weighting explains Independence Axiom violations in monkeys**

**Simone Ferrari-Toniolo\***, **Leo Chi U Seak\***, **Wolfram Schultz**

Department of Physiology, Development and Neuroscience  
University of Cambridge, Cambridge, UK

\* These authors contributed equally to this study.

+ **Corresponding author:** Simone Ferrari-Toniolo

### **Email addresses:**

Simone.ferraritoniolo@gmail.com

Chiuseak@gmail.com

Wolfram.Schultz@Protonmail.com

**Running title:** Axiomatic consistency of risky monkey choices

**Keywords:** Choice, probability, gamble, preference reversal

**Author Contributions:** SF-T and WS designed the experiment, SF-T and LCUS conducted the experiments, SF-T and LCUS analyzed the data, SF-T, LCUS and WS wrote the paper.

**Preprint Server:** An earlier version has been uploaded to bioRxiv and SSRN in November 2021 (CC-BY).

**Competing Interest Statement:** The authors declare no competing interests.

**Data Sharing:** The data from this study will be made available upon reasonable request.

**Open Access:** This article will be distributed under the Creative Commons Attribution License 4.0 (CC-BY).

### **Acknowledgements**

We thank Ms. Christina Thompson, Mr. Aled David and Dr. Henri Bertrand for animal and technical support. The Wellcome Trust (WT 095495, WT 204811), the European Research Council (ERC; 293549) and the US National Institutes of Mental Health Conte Center at Caltech (NIMH; P50MH094258) supported this work.

40 **Abstract**

41 Expected Utility Theory (EUT) provides axioms for maximizing utility in risky choice. The  
42 Independence Axiom (IA) is its most demanding axiom: preferences between two options should  
43 not change when altering both options equally by mixing them with a common gamble. We tested  
44 common consequence (CC) and common ratio (CR) violations of the IA over several months in  
45 thousands of stochastic choices using a large variety of binary option sets. Three monkeys showed  
46 consistently few outright *Preference Reversals* (8%) but substantial graded *Preference Changes*  
47 (46%) between the initial preferred gamble and the corresponding altered gamble. Linear  
48 Discriminant Analysis (LDA) indicated that gamble probabilities predicted most *Preference*  
49 *Changes* in CC (72%) and CR (88%) tests. The Akaike Information Criterion indicated that  
50 probability weighting within Cumulative Prospect Theory (CPT) explained choices better than  
51 models using Expected Value (EV) or EUT. Fitting by utility and probability weighting functions of  
52 CPT resulted in nonlinear and non-parallel indifference curves (IC) in the Marschak-Machina  
53 triangle and suggested IA non-compliance of models using EV or EUT. Indeed, CPT models  
54 predicted *Preference Changes* better than EV and EUT models. Indifference points in out-of-  
55 sample tests were closer to CPT-estimated ICs than EV and EUT ICs. Finally, while the few  
56 outright *Preference Reversals* may reflect the long experience of our monkeys, their more graded  
57 *Preference Changes* corresponded to those reported for humans. In benefitting from the wide  
58 testing possibilities in monkeys, our stringent axiomatic tests contribute critical information about  
59 risky decision-making and serve as basis for investigating neuronal decision mechanisms.

60

## 61 Introduction

62 Most decisions we face include some degree of uncertainty. Economic decision theories that  
63 quantify the uncertainty associated with the choice options propose rigorous mathematical  
64 foundations for choice under risk. Expected Utility Theory (EUT), large parts of which were  
65 formalized by von Neumann and Morgenstern (1944), defines a mathematical framework based on  
66 four simple axioms, completeness, transitivity, continuity and independence. These axioms  
67 constitute the necessary and sufficient conditions for maximizing a specific subjective quantity,  
68 Expected Utility (EU): we simply choose the option with the highest EU. Utility ( $U$ ) is the  
69 subjectively assigned value to a reward magnitude  $m$  ( $U = u(m)$ ), and the subjective value of a  
70 probabilistic reward corresponds to the expected value of the utility distribution, called Expected  
71 Utility ( $EU = \sum u(m_i) \cdot p_i$ ).

72 The independence axiom (IA) constitutes the fourth EUT axiom and is central to defining  
73 EU as subjective value. Together with the continuity axiom, the IA defines how magnitude and  
74 probability are combined to compute the global, subjective value of a risky choice option. The IA  
75 had been implicitly assumed by von Neumann and Morgenstern in their description of EUT tests  
76 and formulated, discussed and empirically tested by Marschak (1950), Allais (1953) and Savage  
77 (1954). The IA states that our preferences should not change when mixing all choice options with a  
78 common gamble. However, experiments have shown for decades that humans fail to comply with  
79 the IA (Allais, 1953; Kahneman & Tversky, 1979; Loomes & Sugden, 1987; Moscati, 2016;  
80 Starmer, 2000), which motivated additions to the existing utility theories, including prominently  
81 Prospect Theory (Kahneman & Tversky, 1979; Tversky & Kahneman, 1992).

82 Several sources of IA violations have been proposed, including subjective probability  
83 weighting, the certainty effect, the fanning-out hypothesis and heuristic schemes (Camerer, 1989;  
84 Kahneman & Tversky, 1979; Katsikopoulos, Gigerenzer, Katsikopoulos, & Gigerenzer, 2008;  
85 Machina, 1982; Savage, 1954). Past studies have also suggested that violations may not be as  
86 systematic as initially thought, reporting a significant proportion of EUT-compliant subjects  
87 (Harless & Camerer, 1994; Hey & Orme, 1994). Moreover, among the studies showing significant  
88 failures of the IA, high variability and conflicting types of violations have been reported (Battalio,  
89 Kagel, & Jiranyakul, 1990; P. Blavatskyy, Ortmann, & Panchenko, 2022; Conlisk, 1989; List &  
90 Haigh, 2005; Ruggeri et al., 2020; G. Wu & Gonzalez, 1998). The type and strength of violations  
91 also differed among distinct populations of subjects (Huck & Müller, 2012). Finally, human choices  
92 were usually tested with a small choice set and not repeated, missing effects of choice variability  
93 within each subject. Altogether, these results leave a fragmented picture on the extent, types and  
94 causes of IA violations. Clarifying these aspects would crucially contribute to understanding the  
95 mechanism underlying economic decisions.

96 The IA has not been tested in non-human primates, leaving an open question about the limits  
97 of compliance with EUT of our closest, experimentally viable, evolutionary relative. Monkeys can  
98 choose between actual outcomes that are tangibly delivered after every choice (as opposed to  
99 hypothetical outcomes) and can perform hundreds of daily choices. Monkeys allow systematic and  
100 incentive-compatible tests of EUT axioms in the same subject across a wide range of tests. Their  
101 reliable and stable performance minimizes errors and rules out insufficient learning, as noted for  
102 rodent tests of the IA axiom (Camerer, 1989; Kagel, Macdonald, Battalio, Kagel, & Mac, 1990).  
103 Monkeys' choices satisfy first-, second- and third-order stochastic dominance, allow comparisons  
104 between risky and riskless utility functions, reveal nonlinear probability weighting, comply with the  
105 EUT continuity axiom, and can respect the Independence of Irrelevant Alternatives of two-  
106 component bundles (Bujold, Seak, Schultz, & Ferrari-Toniolo, 2021; Ferrari-Toniolo, Bujold,  
107 Grabenhorst, Báez-Mendoza, & Schultz, 2021; Ferrari-Toniolo, Bujold, & Schultz, 2019; Genest,

108 Stauffer, & Schultz, 2016; Pastor-Bernier, Plott, & Schultz, 2017; Pelé, Broihanne, Thierry, Call, &  
109 Dufour, 2014; Stauffer, Lak, Bossaerts, & Schultz, 2015; Stauffer, Lak, & Schultz, 2014). However,  
110 without testing the IA, these choice data do not yet allow us to identify specific forms of subjective  
111 value computation. Work on monkeys is particularly suitable for achieving this goal, as the typical  
112 collection of large data sets facilitates thorough comparisons of economic models. As ultimate goal,  
113 well-defined behavioral assessments of EUT axioms, and in particular of the IA, would allow  
114 stringent, concept-based brain investigations of economic choice mechanisms with the high  
115 precision of primate single-cell neurophysiology. Given the evolutionary relationship between  
116 humans and monkeys, evidence of similar IA violations in the two species would help further our  
117 understanding of human decision making, both from an economic perspective and from a  
118 neurophysiological one.

119 Here, we used the IA to test the conditions and limits of utility-maximizing stochastic  
120 choices in three rhesus monkeys. The animals performed thousands of choices between gambles to  
121 identify specific forms of value computation, notably utility and probability-weighting. We  
122 systematically varied the gambles' probabilities in common consequence and common ratio tests  
123 across the whole Marschak-Machina triangle to gain a comprehensive and detailed view of axiom  
124 compliance and violation. The animals consistently showed relatively few outright *Preference*  
125 *Reversals*, possibly due to their extended experience with the gambles, but substantial graded  
126 *Preference Changes*. Comparisons between economic model fits to the measured choices  
127 demonstrated that the probability weighting of Cumulative Prospect Theory (CPT) explained the  
128 choices better than models using Expected Value (EV) or EUT. The graded *Preference Changes* in  
129 our monkeys compared in frequency and strength to those reported for humans. These axiom-driven  
130 experiments identified the critical decision variables for utility-maximizing choices according to the  
131 IA and provide a basis for investigating the underlying neuronal signals in primates.

132

## 133 **Methods**

134

135 **Animals.** Three adult male rhesus macaques (*Macaca mulatta*) were used in this experiment:  
136 Monkey A (13 kg), Monkey B (11.5 kg) and Monkey C (11 kg). The animals were born in captivity  
137 at the Medical Research Council's Centre for Macaques (CFM) in the UK. Monkey A ('Tigger') and  
138 Monkey B ('Ugo') had been surgically implanted with a headpost and a recording chamber for  
139 neurophysiological recording; they were headposted for 2 - 3 hours on each test day of the current  
140 experiment, which was intermingled with neuronal recordings on separate days. Both animals had  
141 previous experience with the visual stimuli and experimental setup (Ferrari-Toniolo et al., 2019).  
142 Monkey C ('Aragorn') had no implant, no head posting and no previous task experience.

143 All experimental procedures had been ethically reviewed and approved and were regulated  
144 and continuously supervised by the following institutions and individuals in the UK and at the  
145 University of Cambridge (UCam): the Minister of State at the UK Home Office, the Animals in  
146 Science Regulation Unit (ASRU) of the UK Home Office implementing the Animals (Scientific  
147 Procedures) Act 1986 with Amendment Regulations 2012, the UK Animals in Science Committee  
148 (ASC), the local UK Home Office Inspector, the UK National Centre for Replacement, Refinement  
149 and Reduction of Animal Experiments (NC3Rs), the UCam Animal Welfare and Ethical Review  
150 Body (AWERB), the UCam Governance and Strategy Committee, the Home Office Establishment  
151 License Holder of the UCam Biomedical Service (UBS), the UBS Director for Governance and  
152 Welfare, the UBS Named Information and Compliance Support Officer, the UBS Named  
153 Veterinary Surgeon (NVS), and the UBS Named Animal Care and Welfare Officer (NACWO).

154

155 **Task design.** Each animal was seated in custom-made a primate chair (Crist instruments) in which  
156 he chose on each trial between two discrete and distinct options that were simultaneously presented  
157 at the right and left on a computer monitor at a distance of 50 cm in front of it. The animal indicated  
158 its choice by moving a joystick (Biotronix Workshop, University of Cambridge) either to the right  
159 or the left by an equal distance. The position of the joystick was monitored via custom code using  
160 Psychtoolbox 3 in Matlab (The MathWorks). The animals were first trained in >10,000 trials to  
161 learn the independently set reward magnitudes ( $m$ ) and probabilities ( $p$ ) that were indicated by a  
162 specifically set visual stimulus. Reward magnitude was signaled by the vertical position of a  
163 horizontal line; the probability of receiving that reward magnitude was proportional to the length of  
164 the horizontal line away from stimulus center (Fig. 1A). A stimulus with a full-length, single  
165 horizontal line corresponded to a sure reward (i.e. a degenerate gamble,  $p = 1$ ), whereas multiple  
166 horizontal lines with less than full length indicated multiple possible gamble outcomes. At the end  
167 of each trial, the chosen option, and no other option, was paid out. From that paid-out option, one,  
168 and only one, of the outcomes was delivered to the animal. Thus, both the options and the outcomes  
169 of each option were mutually exclusive and collectively exhaustive. We used three fixed reward  
170 magnitudes: 0 ml (low;  $m1$ ), 0.25 ml (middle;  $m2$ ) and 0.5 ml (high;  $m3$ ) of the same fruit juice or  
171 water; reward probabilities of the three reward magnitudes ( $p1, p2, p3$ ) varied between 0 and 1,  
172 with a minimum step of 0.02. All option sets alternated pseudo-randomly. More details can be  
173 found in our previous study employing the same presentation design (Ferrari-Toniolo et al., 2021).

174

175 **Revealed preference and choice indifference.** Each animal's preferences were considered to be  
176 revealed from its choices and used as a basis for quantification in later analyses. Preference was  
177 defined as the probability of choosing one gamble over the alternative gamble in the same binary  
178 option set; a gamble was considered to be revealed preferred to another gamble if the first gamble  
179 was chosen with  $P > 0.5$ . Thus, for a binary option set  $\{A,B\}$ , a stochastic preference relation was  
180 defined as  $P(A|\{A,B\}) = N_A/N_{AB}$ , where  $N_A$  was the number of trials in which the monkey chose A  
181 over B, and  $N_{AB}$  was the total number of trials with the  $\{A,B\}$  gamble set. When  $P(A|\{A,B\}) > 0.5$   
182 (i.e. when A was chosen in more than 50% of the trials), the monkey stochastically revealed  
183 preferred A to B. We used the binomial test ( $P < 0.05$ ; 1-tailed) to assess the statistical significance  
184 of such preference relation in a specific direction (either  $P\{A,B\} > 0.5$  or  $P\{A,B\} < 0.5$ ) against  
185 choice indifference (probability of choosing each option with  $P = 0.5$ ). When  $P(A|\{A,B\}) = 0.5$ , the  
186 animal was indifferent between two options A and B (i.e. gamble A was as much revealed preferred  
187 as gamble B).

188

189 **Defining the IA.** The IA states that for any gamble A that is preferred to a gamble B, the  
190 combination of gamble A with gamble G should be preferred to the combination of gamble B with  
191 gamble G; the combined options are themselves gambles and are called C and D. Compliance with  
192 IA requires that the commonly added gamble G does not change the preference for the options.  
193 Thus, individuals who prefer gambles A to B should also prefer gambles C to D (Fig. 1B). Any  
194 preference change constitutes an IA violation. These notions are formally stated as follows:

$$195 \quad \forall A \succ B \Rightarrow pA + (1-p)G \succ pB + (1-p)G; \forall G, \forall p \in [0, 1] \quad \text{Eq. 1}$$

196 with A, B and G as gambles and p as probability. Gamble A was always a degenerate gamble with  
197 only a safe middle reward ( $m2, p2 = 1$ ), as used in Allais' original test (Allais, 1953).

198

199 **Testing the IA.** We assessed IA compliance in two commonly used tests: the common consequence  
200 (CC) test and the common ratio (CR) test.

201 The CC test consisted of adding (or subtracting) the same specific probability of an outcome  
202 ('common consequence') commonly to both options. Gamble A had a single outcome ( $m_2 = 0.25$   
203 ml,  $p_2 = 1$ ), gamble B had three outcomes with fixed magnitudes  $m_1, m_2, m_3$  and varying  
204 probabilities  $p_1, p_2, p_3$  (Fig. 1C). For the CC test, we added a common probability  $k$  to the  
205 probability of the lower outcome ( $p_1$ ) to gambles A and B, which defined two new gambles C and  
206 D; probability  $k$  equals  $p_2$  of option B. Adding probability  $k$  to the  $p_1$  of gambles A and B consisted  
207 of reducing the original  $p_2$  by  $k$  in both gambles (and thus reducing  $p_2$  in gamble B to 0) to  
208 maintain the sum = 1.0 of all probabilities in each gamble.

209 The CR test consisted of multiplying the same 'common ratio' with the probabilities of all  
210 non-zero outcomes commonly for both gambles A and B. Gamble A had the same single outcome  
211 as in the CC test ( $m_2 = 0.25$  ml,  $p_2 = 1$ ), but gamble B had two outcomes with fixed magnitudes  
212  $m_1, m_3$  and varying probabilities  $p_1, p_3$  (Fig. 1D). For the CR test, we multiplied a common ratio  $r$   
213 with the probability of the middle outcome ( $p_2$ ) of gamble A and with the probability of the high  
214 outcome ( $p_3$ ) of gamble B and thus defined two new gambles C and D (thus,  $p_2$  and  $p_3$  of the new  
215 gambles C and D equalled  $p_2$  and  $p_3$  of gambles A and B commonly multiplied by  $r$ ;  $p_1$ 's of  
216 gambles C and D were adjusted to maintain the sum = 1.0 of all probabilities in each gamble).

217 The Marschak-Machina triangle constitutes an elegant scheme for graphically representing  
218 choice options and highlighting the predictions and consequences of IA compliance and violation  
219 (Machina, 1982; Marschak, 1950). In this abstract space (Fig. 1C, D, bottom), the x-axis represents  
220 the probability of obtaining the low outcome ( $p_1$ ) and the y-axis represents the probability of  
221 obtaining the high outcome ( $p_3$ ). The probability of the middle outcome ( $p_2$ ) derives from all  
222 probabilities summing to 1.0:  $p_2 = 1 - p_1 - p_3$ . Each point inside the triangle represents a gamble.  
223 An IA test with two option sets is represented by two parallel lines that connect the original  
224 gambles A and B (blue), and the compounded gambles C and D (green) (note that these lines simply  
225 connect the gambles and do not indicate choice indifference; see below). In CC tests, the probability  
226 of the highest magnitude ( $p_3$ ) remains unchanged between gambles B and D (Fig. 1C bottom); thus,  
227 gamble D has the same vertical position as gamble B (y-axis). Thus, the change from option set  
228 {A,B} to option set {C,D} is graphically represented by a horizontal shift of the option set by  
229 probability  $k$ . In CR tests, probability  $p_3$  changes between gambles B and D; these gambles have  
230 different vertical positions along the hypotenuse (Fig. 1D bottom). The change from option set  
231 {A,B} to option set {C,D} is graphically represented by a horizontal shift of gamble A to become  
232 gamble C, and by a downward shift along the hypotenuse from gamble B to gamble D.

233 In the Marschak-Machina triangle, equally revealed preferred gambles are connected by  
234 indifference curves (IC), whereas unequally preferred gambles are positioned on different ICs (see  
235 Fig. 5). While ICs should be linear and parallel with physical Expected Values (EV) and with  
236 utilities estimated according to EUT, they become non-parallel or curved with violations of the IA  
237 axiom.

238

239 **Definitions of IA violations.** We used two measures for IA violation, *Preference Reversal* and  
240 *Preference Change*, both of which were based on the revealed preference of gamble A to gamble B  
241 indicated by the probability of choice of the initial gambles  $P(A|\{A,B\})$ . Thus, we used stochastic  
242 choices and correspondingly stochastic models to test the IA. While both outright *Preference*  
243 *Reversal* and graded significant *Preference Change* can detect IA violations, they cannot assess  
244 significant axiom compliance, as this corresponds to the null hypothesis of our statistical test.

245 Nonlinear and non-parallel indifference curves in the Marschak-Machina triangle demonstrate IA  
246 violations, as proposed by several non-EU theories (Bhatia & Loomes, 2017; Bordalo, 2012;  
247 Kahneman & Tversky, 1979; Machina, 1982; Savage, 1954).

248 Our first, binary measure for IA compliance was *Preference Reversal*. When the fixed  
249 gamble A was stochastically revealed preferred to gamble B, *Preference Reversal* was manifested  
250 as stochastically preferring gamble D to gamble C:

$$251 P(A|A,B) > 0.5 \text{ \& } P(C|C,D) < 0.5 \quad \text{Eq. 2}$$

252 This reversal, in a non-stochastic setting, was originally observed in humans (Allais-type reversal;  
253 Allais 1953; Kahneman and Tversky 1979). To adapt this measure to stochastic choices, we  
254 assessed the significance of the initial preference  $P(A|A,B) > 0.5$  in comparison with choice  
255 indifference ( $P(A|A,B) = 0.5$ ) using the binomial test (statistical  $P < 0.05$ ; 1-tailed). Then  
256 *Preference Reversal* was evidenced as significant stochastic preference in the opposite direction  
257 ( $P(C|C,D) < 0.5$ ) (binomial test).

258 To the opposite, when gamble B was stochastically revealed preferred to gamble A, we  
259 defined *Preference Reversal* as stochastically preferring gamble C to gamble D:

$$260 P(A|A,B) < 0.5 \text{ \& } P(C|C,D) > 0.5 \quad \text{Eq. 3}$$

261 We assessed the significance of this reverse Allais-type *Preference Reversal* (P. R. Blavatsky, 2013;  
262 Conlisk, 1989) in analogy to the (regular) Allais-type reversal.

263 Our second, more graded measure for IA violation was *Preference Change*. We used the  
264 metric S introduced by Conlisk (1989) who had assessed IA violations non-stochastically from  
265 single choices of multiple human participants. We adapted the Conlisk'S assessment to repeated,  
266 stochastic choices of individual animals and quantified *Preference Change* stochastically as ratio of  
267 probabilities of Allais-type and reverse Allais-type reversals:

$$268 \text{Conlisk'S} = \frac{P(AD)}{P(AD) + P(BC)} - 0.5 \quad \text{Eq. 4}$$

269 P(AD) indicates the probability of Allais-type reversals:  $P(A|A,B) > 0.5$  and  $P(D|C,D) > 0.5$ .  
270 P(BC) indicates the probability of reverse Allais-type reversals:  $P(B|A,B) > 0.5$  and  $P(C|C,D)$   
271  $> 0.5$ . We set Conlisk'S = 0 when  $P(AD) + P(BC) = 0$ .

272 Assuming that choices in different trials were independent, we computed  $P(AD) =$   
273  $P(A|A,B) \cdot P(D|C,D)$ , obtaining:

$$274 \text{Conlisk'S} = \frac{P(A|A,B) \cdot P(D|C,D)}{P(A|A,B) \cdot P(D|C,D) + P(B|A,B) \cdot P(C|C,D)} - 0.5 \quad \text{Eq. 5}$$

275 The Conlisk'S measure is a real number that varies between -0.5 and 0.5. We defined the  
276 significance of Conlisk'S as difference from zero ( $P < 0.05$  on pooled sessions from a given  
277 monkey; one-sample t-test). To avoid unreasonably large violation measures from infrequent  
278 violations, we weighted the Conlisk'S with respect to the total proportion of violations and obtained  
279 the *Preference Change S*:

$$280 S = \text{Conlisk'S} \cdot [P(AD) + P(BC)]; \text{ with } P((AD) + P(BC)) \leq 1.0 \quad \text{Eq. 6}$$

281 In this way, S is a real number that still varies between -0.5 and 0.5 and indicates the same direction  
282 of systematic IA violation as Conlisk'S but corresponds better to the fraction of trials producing the  
283 violation. The S is a measure of how much the preferences vary between option sets {A,B} and  
284 {C,D} (i.e. the non-vertical negative and positive slopes, indicating  $S > 0$  and  $S < 0$ , respectively, in  
285 our preference comparisons in Figs. 2 and 3, red). All subsequent analyses used this S as measure of  
286 *Preference Change*.

287 With repeated choices, IA violations may seem to occur simply because of some random  
288 variability in preferences, but the measure of  $S$  cancels out random violations in opposite directions  
289 and thus results in a robust measure of *Preference Change*. Compliance with the IA is manifested as  
290 *Preference Changes* resulting in  $S = 0$ , which reflects either an absence of IA violations or a  
291 balanced number of random IA violations in the two directions. *Preference Changes* are manifested  
292 by positive or negative  $S$  values that differ significantly from zero ( $P < 0.05$ ; one-sample t-test).

293 In our stochastic version of EUT, *Preference Changes* (significant  $S \neq 0$ ) represent IA  
294 violations in CC tests in which gambles B and D have equal distance from the respective parallel  
295 choice indifference lines representing equal expected utility in the Marschak-Machina triangle (Fig.  
296 1C); the equal utility difference should preserve their preference within their respective option sets  
297 and thus maintain linear and parallel ICs. By contrast, *Preference Changes* in CR tests are  
298 necessary but not sufficient for defining IA violations. The CR test places gambles B and D at  
299 different distances from the respective parallel indifference lines (Fig. 1D) that reflect different  
300 expected utility differences for the two option sets that may result in preference changes (but not  
301 outright preference reversals) without indicating IA violation. In other words, when using a  
302 stochastic model, linear and parallel ICs can produce non-zero  $S$  values in the CR test. Thus, non-  
303 zero  $S$  values do not necessarily indicate IA violations in CR tests.

304

305 **Classification analysis.** To check whether the *Preference Changes* in the IA tests depended on  
306 reward probability, we performed classification analyses. We used a Linear Discriminant Analysis  
307 (LDA) classifier (*fitdiscr* function in Matlab) to predict the sign of the *Preference Change* measure  
308  $S$ . We characterized the changes with a leave-one-out procedure using Linear Discriminant  
309 Analysis (LDA). We trained the LDA with all data except for those from the predicted leave-out  
310 choice tests to build 36 models (18 CC tests and 18 CR tests) for each animal (we discarded one  
311 option set in CR tests with Monkey C in which  $S$  was zero). As each of the 36 models was used to  
312 predict the left-out data, we obtained 36 predictions for each animal. We compared these  
313 predictions to the measured directions of *Preference Change* to check the accuracy of the  
314 prediction. To illustrate the test sensitivity (true positive rate / ability to predict one class) and  
315 specificity (false positive rate / ability to predict the other class), we drew a confusion matrix for the  
316 CC and CR tests, separately for each animal (see Fig. 4).

317

318 **Economic modeling of choice behavior.** We defined a standard discrete choice softmax function  
319 (McFadden, 2001) to describe stochastic preferences. The probability  $P$  of choosing a generic  
320 option A over another option B was defined as:

$$321 P(A|AB) = 1/(1 + e^{-\lambda(V_A - V_B)}) \quad \text{Eq. 7}$$

322 where  $\lambda$  represents the noise parameter, defining the steepness of the preference function (steeper  
323 for higher  $\lambda$  values). Based on EV theory, EUT and Cumulative Prospect Theory (CPT), we used  
324 three models to define the value ( $V$ ) of gambles. These models returned different estimates of  
325 choice probability according to Eq. 7.

326 In the EV model, each option's value was its objective *Expected Value*:

$$327 EV = \sum_i p_i \cdot m_i \quad \text{Eq. 8}$$

328 For a generic three outcome gamble in our task, it corresponded to ( $m_1$  was zero in our task and  
329 therefore  $p_1 \cdot m_1 = 0$ ):

$$330 EV(p_1, p_2, p_3) = p_2 \cdot m_2 + p_3 \cdot m_3 \quad \text{Eq. 9}$$



331 In the EUT model, each option's subjective value was defined via the utility function ( $u$ ) as  
 332 its *Expected Utility*:

$$333 \text{EU} = \sum_i p_i \cdot u(m_i) \quad \text{Eq. 10}$$

334 In our gambles' space this mapped to:

$$335 \text{EU}(p_1, p_2, p_3) = p_2 \cdot u(m_2) + p_3 \cdot u(m_3) \quad \text{Eq. 11}$$

336 In the CPT model, each option's subjective value was called a *Prospect Value* and defined  
 337 by a utility function ( $u$ ) together with a probability weighting function ( $w$ ), combined in a  
 338 cumulative form (Tversky & Kahneman, 1992):

$$339 \text{Prospect Value} = \sum_i \pi_i \cdot u(m_i) \quad \text{Eq. 12}$$

340 where  $\pi_i = w(p_i + \dots + p_n) - w(p_{i+1} + \dots + p_n)$ , with  $n$  indicating the number of outcomes, and  
 341 index  $i$  corresponding to the outcomes ordered from worst to best ( $m_1$  and  $m_3$  respectively, in our  
 342 task). For a generic three-outcome gamble (with probabilities  $p_1, p_2, p_3$ ), Eq. 12 becomes:

$$343 \text{Prospect Value} = u(m_1) \cdot (1 - w(p_2 + p_3)) + u(m_2) \cdot (w(p_2 + p_3) - w(p_3)) + u(m_3) \cdot \\ 344 w(p_3) \quad \text{Eq. 13}$$

345 which, with our set of magnitudes and normalized utility, corresponds to

$$346 \text{Prospect Value} = u(m_2) \cdot (w(p_2 + p_3) - w(p_3)) + w(p_3) \quad \text{Eq. 14}$$

347 In these three value-estimating equations, each  $p_i$  represents the probability of getting the respective  
 348 reward magnitude ( $m_i$ ):  $p_1$  and  $m_1$  represent the probability and magnitude of the lowest outcome (0  
 349 ml);  $p_2$  and  $m_2$  the probability and magnitude of the middle outcome (0.25 ml);  $p_3$  and  $m_3$  are  
 350 relative to the highest outcome (0.5 ml). In the EUT and CPT models, the utility function was  
 351 defined as a power function (free parameter  $\rho$ ), normalized to the highest magnitude level:

$$352 u(m_i) = \left(\frac{m_i}{m_3}\right)^\rho \quad \text{Eq. 15}$$

353 The  $\rho$  parameter defines a convex ( $\rho > 1$ ) or concave ( $\rho < 1$ ) utility function, with  $\rho = 1$   
 354 corresponding to linear utility. Note that having only three magnitude levels in the current  
 355 experiment implied that the only meaningful utility value was that of the middle outcome  
 356 magnitude ( $m_2$ ) in relation to the other two outcomes ( $m_1$  and  $m_3$ ). Thus, although a larger set of  
 357 magnitudes may result in more complex utility functions, a power function would be sufficient to  
 358 account for the difference in subjective evaluation of the three reward magnitudes used in our study.

359 In the CPT model, cumulative probability weighting was defined as a two-parameter *Prelec*  
 360 function (Prelec, 1998; Stott, 2006) as in our earlier study (Ferrari-Toniolo et al., 2019):

$$361 w(p) = e^{-\beta(-\ln(p))^\alpha} \quad \text{Eq. 16}$$

362 where  $\alpha$  allows the function to vary from inverse-S-shaped ( $\alpha < 1$ ) to S-shaped ( $\alpha > 1$ ), while  $\beta$   
 363 shifts the function vertically.

364 We estimated the functions' parameters ( $\theta$ ) with the maximum likelihood estimation (MLE)  
 365 method, by maximizing the log-likelihood function defined (for a choice between generic options A  
 366 and B; using *fminsearch* in Matlab) as:

$$367 LL(\theta | y) = \sum_{i=1}^n y_i \cdot \log(P(A|AB)) + \sum_{i=1}^n y_i \cdot \log(P(B|AB)) \quad \text{Eq. 17}$$

368 The experimental choice outcome was defined for each trial  $i$  by the binary variable  $y_i$  (1 when A  
 369 chosen, 0 when B chosen) and  $y_i'$  (1 when B chosen).

370 To validate our economic models, we used an out-of-sample dataset that consisted of a set of  
371 gambles that differed from the gamble set used for the IA tests. We presented monkeys with choices  
372 between one fixed option (J) on the x axis ( $p1$  between 0 and 0.8 in 0.2 increments) or on the y axis  
373 ( $p3$  between 0.2 and 0.8 in 0.2 increments) and another option (K) with variable  $p1$  (and  $p3$ ) and  
374 fixed  $p2$  (with  $p2$  between 0.2 and 1, in 0.2 increments). For each option J, by varying the  
375 probability  $p1$  in option K, we identified an indifference point (IP) as the point within the triangle  
376 where a fitted softmax preference function would take the value of 0.5. All choice trials in the out-  
377 of-sample test were pseudo-randomly intermingled. IPs were estimated separately in each  
378 weekly session.

379

380 **Comparison with human choices.** We tested whether the observed IA violations in the 18 CC tests  
381 in monkeys corresponded to the violations reported in 39 human studies (P. Blavatsky, Ortmann,  
382 & Panchenko, 2015), using data pooled from all three monkeys. We used two different comparison  
383 methods, a confusion matrix using binary classes of *Preference Change* (either  $S > 0$  or  $S < 0$ ), and  
384 a Pearson correlation using real-number *Preference Changes* ( $S$  varying between -0.5 and +0.5).  
385 However, the gambles used in our monkeys differed from the gambles used in the human studies  
386 (see Fig. 7A). Therefore, for more accurate comparisons, we first needed to predict the *Preference*  
387 *Changes*  $S$  that would have occurred in our monkeys had we used the exact same gambles as in  
388 humans; to control for directionality of testing, we also needed to predict, in the reverse direction,  
389 the *Preference Changes*  $S$  that would have occurred in the human studies had they used the same  
390 gambles as we did in our monkeys.

391 For the confusion matrix, we predicted the  $S$ 's for the unused gambles with an LDA  
392 classifier trained on the  $S$ 's of the actually used gambles. For predicting the monkey  $S$ 's for the  
393 gambles used in the human studies, we trained the LDA with the binary monkey  $S$ 's ( $S > 0$ ,  $S < 0$ ),  
394 and the probabilities for the low and the high magnitudes of the monkey gambles ( $p1$ ,  $p3$ ). In the  
395 reverse direction, for predicting the human  $S$ 's for the gambles used in our monkeys, we trained the  
396 LDA with the binary human  $S$ 's, the probabilities for the low and the high magnitudes of the human  
397 gambles ( $p1$ ,  $p3$ ), and the ratio of the middle and high magnitudes of the human gambles ( $m2 / m3$ ).  
398 Then we used the confusion matrix to compare measured human  $S$ 's with predicted monkey  $S$ 's (see  
399 Fig. 7C left) and, vice versa, measured monkey  $S$ 's with predicted human  $S$ 's (see Fig. 7D left). The  
400 accuracy of the comparison was defined in percent from the ratio: (total number of successful  
401 comparisons) / (total number of comparisons). For example, in the confusion matrix shown in Fig.  
402 7C, the total number of successful comparisons is  $(6 + 26) / (6 + 7 + 0 + 26) = 0.82$ , which equals  
403 82%.

404 For the Pearson correlation, we predicted the  $S$ 's for the unused gambles with two different  
405 multiple linear regression systems depending on the direction of comparison. The regression for the  
406 comparison of measured human *Preference Changes*  $S$  with predicted monkey  $S$ 's first estimated  
407 the beta parameters for the  $S$ 's measured in monkeys as follows:

$$408 \text{ Measured}'S_{\text{monkey}} = b_0 + b_1 \cdot p_{1\text{-monkey}} + b_2 \cdot p_{3\text{-monkey}} \quad \text{Eq. 18}$$

409 with  $p1\text{-monkey}$  and  $p3\text{-monkey}$  as probabilities of lowest and highest magnitude of the gambles  
410 used in option B in monkeys. Then we applied the estimated betas from Eq. 18 to all gambles used  
411 in the 39 human studies to predict the numeric *Preference Change*  $S$  for these gambles in monkeys:

$$412 \text{ Predicted}'S_{\text{monkey}} = b_0 + b_1 \cdot p_{1\text{-human}} + b_2 \cdot p_{3\text{-human}} \quad \text{Eq. 19}$$

413 with  $p1\text{-human}$  and  $p3\text{-human}$  as probabilities of lowest and highest magnitude of the gambles used  
414 in option B in humans. Then we compared the measured human  $S$ 's with the predicted monkey  $S$ 's  
415 using a Pearson correlation (see Fig 7C right).

416 In the reverse direction, comparing measured monkey S's with predicted human S's, the  
417 regression first estimated the beta parameters for the *Preference Change S* measured in humans  
418 with the modified regression model:

$$419 \text{ Measured } S_{\text{human}} = \\ 420 = b_0 + b_1 \cdot p_{1\text{-human}} + b_2 \cdot p_{3\text{-human}} + b_3 \cdot (m_{2\text{-human}} / m_{3\text{-human}}) \quad \text{Eq. 20}$$

421 with  $p_{1\text{-human}}$  and  $p_{3\text{-human}}$  as probabilities of lowest and highest magnitudes of gamble B, and  
422  $m_{2\text{-human}}$  and  $m_{3\text{-human}}$  as middle and highest magnitude used in humans (magnitudes varied  
423 across the human studies but were constant in all monkey gambles). Then we applied the estimated  
424 betas from Eq. 20 to all gambles used in our monkeys to predict the numeric *Preference Change S*  
425 for these gambles in humans:

$$426 \text{ Predicted } S_{\text{human}} = \\ 427 = b_0 + b_1 \cdot p_{1\text{-monkey}} + b_2 \cdot p_{3\text{-monkey}} + b_3 \cdot (m_{2\text{-monkey}} / m_{3\text{-monkey}}) \quad \text{Eq. 21}$$

428 with  $p_{1\text{-monkey}}$  and  $p_{3\text{-monkey}}$  as probabilities of lowest and highest magnitudes of gamble B,  
429 and  $m_{2\text{-monkey}}$  and  $m_{3\text{-monkey}}$  as middle and highest magnitude used in monkeys. Then we  
430 compared the measured monkey S's with the predicted human S's using Pearson correlation (see Fig  
431 7D right).

432

## 433 Results

434

435 **Experimental design.** We used stochastic choices to test compliance with the independence axiom  
436 (IA) in three monkeys. Two visual bar stimuli indicated two respective choice options on a  
437 computer monitor in front of the animal. The animal chose by moving a joystick towards one of the  
438 two options and 1.0 sec later received the reward of the chosen option. Each option was a gamble  
439 defined by three reward magnitudes ( $m_1$ ,  $m_2$ ,  $m_3$ ; ml of fruit juice) occurring with specific  
440 probabilities ( $p_1$ ,  $p_2$ ,  $p_3$ ; sum = 1.0) (Fig. 1A). Reward magnitude was indicated by bar height  
441 (higher was more), and the probability of delivering each magnitude was indicated by bar length  
442 away from stimulus center (longer was higher).

443 Testing the IA began with two gambles A and B that formed option set {A,B}. Gamble A  
444 was a degenerate gamble with safe and fixed middle reward magnitude ( $m_2 = 0.25$  ml;  $p_2 = 1.0$ ),  
445 whereas gambles B, C and D were two- or three-outcome gambles. The test gambles C and D  
446 derived from the common addition of gamble G and constituted option set {C,D} (Eq. 1).  
447 Stochastic compliance with the IA requires that preferences do not change significantly between  
448 option sets {A,B} and {C,D} (Fig. 1B). We assessed the IA in the common consequence (CC) test  
449 and in the common ratio (CR) test (see Methods for definitions; Fig. 1C, D). When representing the  
450 gambles in the Marschak-Machina triangle, an IA test was plotted as a parallel shift of the line  
451 connecting the two gambles of each option set ({A,B} and {C,D}), with an additional line length  
452 change for a CR test.

453

454 **IA violations.** We performed 18 different CC tests and 18 different CR tests in each of the three  
455 monkeys; each test was repeated on average 7.5 times per daily session for Monkey A, 17.7 times  
456 per session for Monkey B and 6.1 times per session for Monkey C. We systematically varied the  
457 reward probabilities and thereby tested the IA across the whole range represented by the Marschak-  
458 Machina triangle. We tested two violation directions: either gamble A was stochastically revealed

459 preferred to gamble B (probability of choice  $P(A|\{A,B\}) > 0.5$ ) and gamble D was stochastically  
460 preferred to gamble C ( $P(C|\{C,D\}) < 0.5$ ) (Allais-type violation; Allais 1953), or gamble B was  
461 revealed preferred to gamble A ( $P(A|\{A,B\}) < 0.5$ ) and gamble C was stochastically preferred to  
462 gamble D ( $P(C|\{C,D\}) > 0.5$ ) (reverse Allais-type violation; Blavatsyy, 2013b). We considered two  
463 IA violation types, the more substantial binary *Preference Reversals* and the more subtle graded  
464 *Preference Changes*.

465 *Preference Reversals* across option sets {A,B} and {C,D} were defined by Eqs. 2 and 3 for  
466 AD and BC preference directions and tested for significance using the 1-tailed binomial test applied  
467 separately to Allais-type and reverse Allais-type reversals ( $P < 0.05$ ; see Methods). IA violations  
468 indicated by significant *Preference Reversals* occurred only in a few of the 36 tests (N=8 for  
469 Monkey A, N=1 for Monkey B, N=0 for Monkey C; total of 8% (CC: 11%, CR: 6%); Table 1).  
470 Note that all animals were highly familiar with gamble variations from tens of thousands of trials  
471 performed during several months of weekdaily experimentation.

472 *Preference Changes* were defined by Eqs. 4 - 6 that computed the variable S derived from  
473 Conlisk'S and tested for significance using a one-sample t-test against  $S = 0$  in pooled sessions from  
474 a given monkey ( $P < 0.05$ ). In contrast to the few outright *Preference Reversals*, significant  
475 *Preference Changes* using the metric S were rather frequent in all animals (N=21 for Monkey A,  
476 N=12 for Monkey B, N=17 for Monkey C; total of 46% (CC: 41%, CR: 52%); Table 2).

477 *Preference Changes* are sufficient for defining IA violations in CC tests; here, gambles B  
478 and D have equal distance from the respective parallel choice indifference lines representing equal  
479 expected utility in the Marschak-Machina triangle (Fig. 1C); the equal utility difference should  
480 preserve their preference within their respective option sets and thus produce no violation.  
481 *Preference Changes* S can be conveniently graphed as slopes between option sets {A,B} and  
482 {C,D}; negative and positive slopes indicate  $S > 0$  and  $S < 0$ , respectively (Fig. 2). The strongest  
483 positive *Preference Changes* S were significant across sessions in all animals:  $S = 0.026 \pm 0.013$   
484 (Monkey A),  $S = 0.095 \pm 0.015$  (Monkey B),  $S = 0.052 \pm 0.010$  (Monkey C) (mean  $\pm$  Standard  
485 Error of the Mean, SEM; all  $P < 0.05$ ; one-sample t-test) (Fig. 2A). The strongest negative S's were  
486 also significant across sessions in all animals:  $S = -0.254 \pm 0.020$  (Monkey A),  $S = -0.167 \pm 0.014$   
487 (Monkey B),  $S = -0.123 \pm 0.014$  (Monkey C) (Fig. 2B). The weakest absolute S's differed only  
488 insignificantly from zero and thus failed to demonstrate IA violation (Fig. 2C). Fig. S1 shows the  
489 full pattern of *Preference Changes* in all CC tests.

490 In CR tests, *Preference Changes* are only necessary and not sufficient for IA violations; the  
491 test places gambles B and D at different distances from the respective parallel indifference lines  
492 (Fig. 1D), reflecting different expected utility differences for the two option sets that may result in  
493 graded *Preference Changes* and thus non-zero S values (but not outright *Preference Reversals*) but  
494 do not indicate IA violations. The strongest positive *Preference Changes* S were significant across  
495 sessions:  $S = 0.095 \pm 0.0143$  (Monkey A),  $S = 0.014 \pm 0.015$  (Monkey B),  $S = 0.078 \pm 0.009$   
496 (Monkey C); all  $P < 0.05$ ) (Fig. 3A), as were the strongest negative S's:  $S = -0.183 \pm 0.014$  (Monkey  
497 A),  $S = -0.227 \pm 0.019$  (Monkey B),  $S = -0.086 \pm 0.012$  (Monkey C) (Fig. 3B). The smallest  
498 measured absolute S's were insignificant (Fig. 3C). Fig. S2 shows the full pattern of *Preference*  
499 *Changes* in all CR tests.

500 To summarize, all monkeys showed significant *Preference Changes* in both CC and CR  
501 tests. Below we describe these results in more detail to identify possible factors contributing to the  
502 observed patterns of *Preference Changes*.

503

504 **Probability dependency of Preference Changes.** Whereas previous human studies tested specific  
505 gambles, behavioral studies with monkeys can last several months during which large numbers of  
506 behavioral tests can be carried out. We have therefore been able to study choices of gambles over  
507 larger ranges of probabilities that fill wider areas of the Marschak-Machina triangle. This possibility  
508 allowed us to test whether the *Preference Changes* might depend on the probabilities of gamble  
509 outcomes, irrespective of particular preferences between the initial gambles A and B.

510 For the CC test, we varied the probability of the low outcome of gamble B ( $Bp1$ ; i.e. the  
511 probability of receiving 0 ml in option B) and the probability of the high outcome ( $Bp3$ ; i.e. the  
512 probability of receiving 0.5 ml in option B; thus,  $Bp2 = 1 - Bp3 - Bp1$ ). In accordance with the  
513 definition of the CC test, we defined gambles C and D by adding a common probability  $k$  to options  
514 A and B (Fig. 1C). This corresponded to adding probability  $Bp2$  to the probabilities  $p1$  of gambles  
515 A and B (and thus reducing the original  $p2$  of gambles A and B). Therefore, we fully identified each  
516 CC test by the set of probabilities for gamble B ( $Bp1$ ,  $Bp3$ ), without the need to explicitly introduce  
517 the probability  $k$ . Significant IA *Preference Changes* occurred in both directions in different parts  
518 of the Marschak-Machina triangle (Fig. 4A;  $S > 0$ , purple dots;  $S < 0$ , cyan dots; black circles  
519 indicate  $P < 0.05$ , one-sample t-test against zero). As shown in the confusion matrices, LDA  
520 classifications correctly predicted 14 out of 18 tests (78%) in each of Monkey A and Monkey B,  
521 and 11 out of 18 tests (61%) in Monkey C, which exceeded random prediction (50%) and was no  
522 less than prediction with majority class (i.e. the majority type of the direction of *Preference Change*  
523 for each monkey; 72% for Monkey A, 50% for Monkey B and 61% for Monkey C) (Fig. 4A insets).  
524 These results suggested a systematic relationship between *Preference Changes* and reward  
525 probabilities in the CC test.

526 For the CR test, we varied the ratio  $r$  and the high-outcome probability in gamble B ( $Bp3$ ;  
527 i.e. the probability of receiving 0.5 ml in option B; thus,  $Bp1 = 1 - Bp3$ ). We defined gambles C and  
528 D by multiplying the common ratio  $r$  with the probabilities of all non-zero outcomes of gambles A  
529 and B. Therefore, the two variables  $Bp3$  and  $r$  defined fully a particular CR test. Significant IA  
530 *Preference Changes* occurred in both directions in different parts of the parameter space (Fig. 4B;  $S$   
531  $> 0$ , purple dots;  $S < 0$ , cyan dots;  $P < 0.05$ ). The confusion matrices showed that LDA  
532 classifications correctly predicted 17 out of 18 tests (94%) in Monkey A, 15 out of 18 tests (83%) in  
533 Monkey B, and 15 out of 17 tests (88%) in Monkey C, all of which exceeded random prediction and  
534 was no less than prediction with majority class (94% for Monkey A, 67% for Monkey B, 82% for  
535 Monkey C) (Fig. 4B insets). Hence, similar to the CC test, the *Preference Changes* in the CR test  
536 depended on gamble probabilities.

537 The systematic nature of the observed *Preference Changes* in both the CC tests and the CR  
538 test encouraged us to model the observed changes mathematically using economic theory.  
539 Therefore, we next fitted our data using different economic choice models and tested whether these  
540 models might explain the observed violations.

541

542 **Economic models characterizing Preference Changes.** We compared different economic choice  
543 models in their ability to explain the observed pattern of Preference Changes. We fitted choice data  
544 to stochastic implementations of basic constructs of three economic theories: objective Expected  
545 Value (EV), Expected Utility Theory (EUT) and Cumulative Prospect Theory (CPT).

546 We defined a standard discrete choice softmax function (McFadden, 2001) to describe  
547 stochastic preferences as the probability of choosing one option over another, in repeated trials (Eq.  
548 7). This function calculates the probability of choosing the first of two options from the value  
549 difference between the two options and includes a noise term that accounts for variability in

550 choices. The difference between the choice models consisted of different value computations: in the  
551 EV model, each option's value corresponded to its objective Expected Value (EV; Eqs. 8 and 9); in  
552 the EUT model, value was defined as Expected Utility using a utility function (EU; Eqs. 10 and 11);  
553 in the CPT model, value was defined as *Prospect Value* and resulted from a utility function ( $u$ ) and  
554 a probability weighting function ( $w$ ), combined in a cumulative form (Eqs. 12-14). The utility  
555 function was a power function (one free parameter), normalized to the highest magnitude (Eq. 15).  
556 The probability weighting function was a two-parameter *Prelec* function (Eq. 16). These parametric  
557 functions have been shown to maximize the information extraction from participant data (Stott,  
558 2006). Finally, we used a maximum likelihood estimation procedure to identify the model  
559 parameters that best represented the behaviorally measured probability of choice: we estimated the  
560 parameters that maximized the standard log-likelihood function (Eq. 17).

561 We used the Akaike Information Criterion (AIC) for an initial comparison of the accuracy of  
562 each model, based on the maximum likelihood function (lower AIC values indicate better fit). The  
563 AICs of the EV model were  $204.4 \pm 11.4$  for Monkey A,  $144.8 \pm 4.8$  for Monkey B, and  $216.8 \pm$   
564  $8.0$  for Monkey C (mean  $\pm$  standard error of the mean, SEM). The AICs of the EUT model across  
565 sessions were  $149.5 \pm 10.8$  for Monkey A,  $118.7 \pm 4.2$  for Monkey B, and  $115.6 \pm 4.2$  for Monkey  
566 C. The AICs of the CPT model were  $140.5 \pm 10.1$  for Monkey A,  $114.4 \pm 4.1$  for Monkey B, and  
567  $110.4 \pm 4.3$  for Monkey C. The differences between the three AIC values were significant in each  
568 animal ( $P = 6.08 \cdot 10^{-05}$  for Monkey A,  $P = 1.50 \cdot 10^{-06}$  for Monkey B, and  $P = 4.67 \cdot 10^{-33}$  for Monkey  
569 C; one-way ANOVA). Pairwise post-hoc comparison showed significant differences between the  
570 EUT and EV models ( $P = 2.98 \cdot 10^{-16}$  for Monkey A,  $P = 8.47 \cdot 10^{-20}$  for Monkey B, and  $P = 5.55 \cdot 10^{-$   
571  $30$  for Monkey C; paired t-test) and between the CPT and EUT models ( $P = 8.41 \cdot 10^{-10}$  for Monkey  
572 A,  $P = 2.02 \cdot 10^{-10}$  for Monkey B, and  $P = 8.58 \cdot 10^{-11}$  for Monkey C). Thus, the CPT model showed  
573 the lowest AIC values in all three monkeys and thus explained our choice data best. We therefore  
574 used the CPT model for our further analyses.

575 According to the CPT model, Monkey A had basically a linear utility function ( $U(m)$ ;  
576 estimated parameter:  $\rho = 1.01$ ) and a probability weighting function with an inverse-S shape ( $W(p)$ ;  
577 estimated parameters:  $\alpha = 1.86$ ;  $\beta = 0.42$ ), whereas Monkeys B and C had convex utility functions  
578 ( $\rho = 1.43$  and  $\rho = 1.63$ , respectively) and inverted-S-shaped probability weighting functions ( $\alpha =$   
579  $1.31$ ;  $\beta = 1.13$  and  $\alpha = 1.37$ ;  $\beta = 0.767$ , respectively) (Fig. 5A, insets).

580 To better understand and visualize how the CPT model might explain the IA violations, we  
581 computed the indifference curves (ICs) in the Marschak-Machina triangle (Fig. 5A left), based on  
582 the utility and probability weighting functions estimated from the best-fitting CPT model (Fig. 5A,  
583 insets). According to the EV and EUT models, the ICs in the Marschak-Machina triangle should be  
584 linear and parallel to each other, while CPT produces non-linear and non-parallel ICs. The  
585 indifference map (i.e. the full set of ICs) computed from the best fitting CPT model in each animal  
586 showed monkey-specific patterns of non-linear ICs, which reflected the subjective value of choice  
587 options (Fig. 5A, colored lines). We considered the “fanning” direction of the ICs to further  
588 characterizes IA violations (Machina, 1982); “fanning-out” (higher ICs more horizontal than lower  
589 ones) characterizes Allais-type violations, and “fanning-in” characterizes reverse Allais-type  
590 violations. We observed a predominantly fanning-in pattern, although areas of fanning-out existed  
591 within the triangle. This pattern reflected the mostly negative values of the measured *Preference*  
592 *Changes*, supporting the idea that IA violations reflected a non-linear distribution of subjective  
593 values within the Marschak-Machina triangle, which is incompatible with EUT.

594 To examine how well CPT explained the observed *Preference Changes*, we calculated the S  
595 values that were predicted by the model for each CC and each CR test. On a session-by-session  
596 basis, we estimated the choice probability from outcome probability and magnitude according to

597 Eq. 7 together with Eqs. 12 - 14. The estimated choice probability was then used to calculate each S  
598 using Eq. 6. When comparing the measured and predicted S values for each session, we found  
599 significant Pearson correlation coefficients in all monkeys in the CC test (Monkey A:  $\rho = 0.46$ ,  $P =$   
600  $2.1 \cdot 10^{-53}$ ; Monkey B:  $\rho = 0.21$ ,  $P = 8.9 \cdot 10^{-9}$ ; Monkey C:  $\rho = 0.29$ ,  $P = 4.4 \cdot 10^{-49}$ ) as well as in the  
601 CR test (Monkey A:  $\rho = 0.74$ ,  $P = 1.1 \cdot 10^{-188}$ ; Monkey B:  $\rho = 0.60$ ,  $P = 2.4 \cdot 10^{-72}$ ; Monkey C:  $\rho =$   
602  $0.64$ ,  $P = 2.6 \cdot 10^{-287}$ ) (Fig. 5B). Thus, the CPT model was compatible with the observed pattern of  
603 violations.

604 We tested the robustness of the CPT model's IC estimation with out-of-sample tests. The  
605 animal chose between a fixed option, plotted on one of the axes of the Marschak-Machina triangle,  
606 and a varying two- or three-outcome gamble (see Methods). In each session, indifferent points (IPs)  
607 were estimated by fitting a softmax function to the measured animal's choices. If the modeled  
608 indifference map reflected the true subjective evaluation pattern, the modeled IPs should be close to  
609 the measured ICs. A graphical comparison between the IPs and the ICs in Fig. 6A predicted by the  
610 CPT model demonstrated good correspondence between the out-of-sample IPs (colored points) and  
611 the modeled ICs (lines with same color as IPs). When quantifying the distance between the  
612 measured out-of-sample IPs and the ICs predicted by the EV, EUT or CPT models, we found  
613 significant residuals in all three models ( $P < 0.01$  against the ICs; one-sample t-test). The residuals  
614 were significantly different across the models in all three monkeys, as revealed by one-way  
615 ANOVA tests ( $P = 3.10 \cdot 10^{-86}$  for Monkey A,  $P = 2.66 \cdot 10^{-33}$  for Monkey B, and  $P = 5 \cdot 10^{-324}$  for  
616 Monkey C); post-hoc paired t-tests demonstrated smaller residuals for the CPT model compared to  
617 the EV and EUT models (Fig. 6B), except for data from Monkey B resulting in a non-significant  
618 difference between EUT and CPT model residuals (EUT vs EV:  $P = 5.24 \cdot 10^{-26}$  for Monkey A,  $P =$   
619  $2.84 \cdot 10^{-32}$  for Monkey B, and  $P = 1.35 \cdot 10^{-134}$  for Monkey C; CPT vs EUT:  $P = 1.28 \cdot 10^{-08}$  for  
620 Monkey A,  $P = 0.734$  for Monkey B, and  $P = 9.26 \cdot 10^{-22}$  for Monkey C). Thus, the CPT model  
621 captured the out-of-sample IPs more accurately than the other models.

622 Although in their original deterministic formulation the EV and EUT models would not  
623 theoretically produce all-or-none *Preference Reversals*, their stochastic versions using the softmax  
624 choice function could in principle result in graded *Preference Changes*, in particular in the CR test  
625 (see Methods below Eq. 6). We thus investigated in more detail how much the EUT and EV models  
626 would explain our data (Figs. S3, S4). Our analysis showed that EV and EUT models failed to  
627 explain violations in the CC test, always predicting null *Preference Changes* ( $S = 0$ ) (Figs. S3B,  
628 inset). On the other hand, both models predicted the violation pattern in the CR test to some degree  
629 (Figs. S3B, S4B), consistent with previous studies employing stochastic versions of the EUT model  
630 (P. R. Blavatsky, 2007). However, the Pearson correlation coefficients of the EV and EUT models  
631 had worse prediction power (smaller correlation coefficients) compared to the CPT model (EV:  $\rho =$   
632  $0.26$ ,  $P = 3.1 \cdot 10^{-18}$  for Monkey A,  $\rho = 0.51$ ,  $P = 9.3 \cdot 10^{-50}$  for Monkey B, and  $\rho = 0.22$ , and  $P =$   
633  $1.7 \cdot 10^{-28}$  for Monkey C; and EUT:  $\rho = 0.55$ ,  $P = 4.4 \cdot 10^{-86}$  for Monkey A,  $\rho = 0.59$ ,  $P = 2.1 \cdot 10^{-69}$  for  
634 Monkey B, and  $\rho = 0.52$ ,  $P = 8.6 \cdot 10^{-172}$  for Monkey C) (Figs. S3 and S4).

635 As a further control, we explicitly tested the hypothesis of ICs being linear and parallel, as  
636 implied by EUT (Fig. S5). Because previous human studies usually performed tests on only a few  
637 gambles, as plotted in the Marschak-Machina triangle (Fig. 7A; Blavatsky et al., 2015), this  
638 method has never been used to investigate EUT. In the current study, we tested separately the  
639 linearity and parallelism of the ICs. To test for parallelism, we assumed linear ICs and used a least-  
640 squares model to estimate the slopes of the ICs and compare them (Kruskal-Wallis one-way  
641 ANOVA; Fig. S5A, B). The linearity of the ICs was tested through the residuals of indifferent  
642 points in each IC that were estimated with linear least squares using out-of-sample IPs (one-sample  
643 t-test against 0; Fig. S5C). We found significant non-linearity ( $p < 0.001$ ) and non-parallelism

644 ( $p < 0.05$ ) for some ICs, suggesting that EUT was not able to capture the subjective values for  
645 varying probabilities. This result demonstrates systematic violations in EUT, which was consistent  
646 with our AIC and residual analyses. The pattern of generally increasing ICs slopes (Fig. S5B) also  
647 served as confirmation for a mostly fanning-in direction of the indifference map, which explained  
648 the observed pattern of IA violations with mostly negative *Preference Change* values.

649 Taken together, these results showed that the CPT-based economic choice model predicted  
650 the IA violations in both CC and CR tests, outperforming both the EV and the EUT models. These  
651 findings suggest that the observed violation pattern might arise from the subjective, non-linear  
652 weighting of reward probabilities, in line with the explanation provided by CPT.

653 **Comparison of *Preference Changes* with humans.** To explore the possibility of common  
654 economic decision mechanisms between evolutionary close species, we compared the observed IA  
655 violations in monkeys with those found in humans. We considered results from 39 human studies  
656 investigating the CC effect (P. Blavatsky et al., 2015). Many of these studies repeated the Allais  
657 test; others defined different tests which, when represented in the Marschak-Machina triangle (as  $p1$   
658 and  $p3$  of gamble B), were mostly concentrated in the lower left area (Fig. 7A). The human studies  
659 reported significant *Preference Changes* characterized by  $S > 0$  or  $S < 0$ , as well as insignificant  
660 changes ( $S \sim 0$ ) (Fig. 7B).

661 We used two methods to compare our monkey data with the published human data, a  
662 confusion matrix and a Pearson correlation. The gambles used in the human studies differed from  
663 each other and from those used in monkeys. To nevertheless allow accurate comparisons, we  
664 predicted the *Preference Changes*  $S$  for the untested gambles with an LDA classifier for the  
665 confusion matrix, and with two multiple linear regressions for the Pearson correlation (see Methods;  
666 Eqs. 18 - 21).

667 For the missing gambles, we first used the LDA and the regressions (Eqs. 18 and 19) to  
668 predict the  $S$ 's in our monkeys for the gambles that had been used in humans. Then we compared  
669 the actually measured human  $S$ 's with the predicted monkey  $S$ 's. The confusion matrix showed that  
670 the actual measured  $S$ 's in humans corresponded successfully to the LDA-predicted  $S$ 's in monkeys  
671 with 82% accuracy (Fig. 7C left), which exceeded random (50%) and majority class (i.e. the  
672 majority type of the direction of  $S$ 's across all human studies, 67%). The Pearson correlation  
673 between human  $S$ 's that had been measured and monkey  $S$ 's that had been predicted by regression  
674 (Eqs. 18 and 19) was significant ( $\rho = 0.56$ ,  $P = 2.44 \cdot 10^{-4}$ ) (Fig. 7C right).

675 To test the robustness of these comparisons, we reversed the direction of predicting  $S$ 's for  
676 untested gambles: using LDA and regressions (Eqs. 20 and 21), we predicted the  $S$ 's in humans for  
677 the gambles we had used in monkeys. The confusion matrix showed that the measured monkey  $S$ 's  
678 corresponded to the LDA-predicted human  $S$ 's with 70% accuracy, which exceeded random (50%)  
679 and majority class (61%) (Fig. 7D left). The Pearson correlation between the measured monkey  $S$ 's  
680 and the regression-predicted human  $S$ 's (Eqs. 20 and 21) was significant ( $\rho = 0.45$ ,  $P = 5.61 \cdot 10^{-4}$ ;  
681 Fig. 7D right).

682 Thus, while we saw less *Preference Reversals* than are generally reported in humans, the  
683 *Preference Changes* in our monkeys corresponded well to those in humans. The result suggests  
684 shared decision mechanisms across primate species and encourages neurophysiological  
685 investigations in monkeys of neuronal signals and circuits that may underlie these common choice  
686 mechanisms.

687



## 688 Discussion

689 We studied stochastic choices in rhesus monkeys in the two most widely used tests of the IA,  
690 common consequence and common ratio, which provide stringent assessment for utility  
691 maximization. All three tested monkeys showed consistently few outright *Preference Reversals*  
692 between the initial and the altered option sets, possibly due to the animals' extended laboratory  
693 experience with weekdaily tests; however, the animals showed substantial graded *Preference*  
694 *Changes* (Figs. 2 and 3; Tables 1 and 2) that depended on gamble probabilities and were largely  
695 explained by nonlinear probability weighting (Figs. 4 and 5). According to AIC and out-of-sample  
696 analyses, a CPT model with probability weighting explained the choices better than EUT and EV  
697 models without probability weighting (Fig. 6). Classification and regression analyses demonstrated  
698 similarities between our monkeys' choices and reported human choices (P. Blavatskyy et al., 2015,  
699 2022) (Fig. 7). Together, these results indicate systematic *Preference Changes* in IA tests in  
700 monkeys that can be explained by probability weighting of CPT.

701 While human studies played a crucial role in identifying and explaining IA violations, in  
702 particular non-linear probability weighting (P. Blavatskyy et al., 2022; P. R. Blavatskyy, 2007;  
703 Camerer & Ho, 1994; Conlisk, 1989; Harman & Gonzalez, 2015; Quiggin, 1982; Ruggeri et al.,  
704 2020; Schneider & Day, 2016; Tversky & Kahneman, 1992), the studies were restricted by a  
705 number of species-specific factors, including limited trial numbers, limited test variations, limited  
706 test repetitions, insufficient learning, behavioral errors and, of course, language and cultural  
707 influences. To compensate for limits of trial numbers, some human studies combined data from  
708 multiple participants; however, the validity of such tests depends on the subjectivity of individual  
709 utility functions and on cultural differences (Loubergé & Outreville, 2011; Ruggeri et al., 2020).  
710 Thus, more comprehensive assessments of IA compliance would benefit from wider test variations  
711 with more trials than are feasible in humans. This is where monkeys come in. Working with  
712 monkeys not only avoids cultural biases but also allows large variations of test conditions during  
713 thousands and tens of thousands of trials during weekdaily tests over weeks and months. With such  
714 large trial numbers, errors are minimized and learning would be completed and thus play no  
715 uncontrolled role. The resulting consistent performance allowed us to investigate the robustness of  
716 economic models that confirm the dominant role of probability weighting in common consequence  
717 and common ratio IA tests.

718 This study found fewer outright *Preference Reversals* (8%) than those seen in human  
719 studies; we saw primarily graded *Preference Changes*. The limited violations in the IA tests  
720 resemble the compliance of the Independence of Irrelevant Alternatives of two-component bundles  
721 (Pastor-Bernier et al., 2017). Good compliance in the two tests may be due to the high task  
722 familiarity of the animals tested in thousands of trials. To assure well-controlled test conditions, our  
723 monkeys performed in our specific primate testing laboratory away from their living area in the  
724 animal house. For ethical reasons, such laboratory tests are limited to a few animals. However, in  
725 this highly standardized test situation the different animals performed very consistently and  
726 similarly to each other. In support of this notion, further four monkeys in two separate studies in our  
727 laboratory showed consistent risk attitude that was compatible with S-shaped, convex-linear-  
728 concave utility functions with increasing juice volumes (Genest et al., 2016; Stauffer et al., 2015).  
729 Thus, while ethical considerations, general welfare and individual comfort are essential for  
730 obtaining reliable results from cooperative animals, the presented research on monkeys adds  
731 important data to the notion of assessing utility maximization with the IA axiom that had so far  
732 been tested in humans and, in select cases, in rodents (Battalio, Kagel, & MacDonald, 1985; Kagel  
733 et al., 1990).

734 Probability weighting is a particularly interesting and important explanation for IA  
735 violations. Although reward probability can influence the type and level of IA violations, most  
736 human IA violation tests used only limited levels of probability. We tested many probability levels  
737 across the Marschak-Machina triangle and substantiated probability weighting as major mechanism  
738 underlying *Preference Changes* in both the common consequence and the common ratio tests. We  
739 did not make any hypothesis about the existence of probability weighting but instead demonstrated  
740 empirically that probability weighting explains *Preference Changes*. Specifically, our leave-one-out  
741 classification with LDA demonstrate probability as key factor underlying IA *Preference Changes* in  
742 both common consequence and common ratio tests (Fig. 4), and the CPT probability weighting  
743 function fitted to the measured behavioral choices successfully predicted *Preference Changes* (Fig.  
744 5). Thus, our study provides a detailed and robust account of the role of probability weighting in IA  
745 tests. In addition to probability weighting, it has been proposed that the salience of the visual cues  
746 for reward probability information (i.e., the length of the stimulus bar in our study) could contribute  
747 to choice biases (Spitmaan, Chu, & Soltani, 2019), suggesting a future direction for investigating its  
748 role in IA violations.

749 Past studies have reported different shapes of the probability weighting function. Humans  
750 show anti-S and S-shape probability weighting with instructed and experienced probabilities,  
751 respectively (Cavagnaro, Pitt, Gonzalez, & Myung, 2013; Farashahi, Azab, Hayden, & Soltani,  
752 2018; Gonzalez & Wu, 1999). Monkeys show anti-S probability-weighting with pseudorandomly  
753 varying probabilities (Stauffer et al., 2015) and S-shape weighting in trial blocks (Ferrari-Toniolo et  
754 al., 2019). When presenting a larger set of magnitudes and probabilities, and allowing for more  
755 complex shapes of the utility function, our monkeys' choices were best explained by a mostly  
756 concave probability weighting function (Ferrari-Toniolo et al., 2021). Humans show a similar  
757 concave probability weighting function (P. Blavatskyy, 2013). Our current results confirm concave  
758 probability weighting with a larger set of finely varying probabilities in three-outcome gambles that  
759 allowed us to uniformly sample the whole probability space (Fig. 5A). Our results highlight a series  
760 of possible factors contributing to the estimated shape of the probability weighting function: the  
761 choice of the functional form for utility and probability weighting, the range and resolution of the  
762 tested magnitudes and probabilities, and the complexity and representation of choice options  
763 (especially two- and three-outcome gambles). Further investigations are required to better isolate  
764 the factors influencing the shape of the probability weighting function, including task particulars  
765 and elicitation procedures.

766 Past studies graphed IA violations via the fanning-in and fanning-out directions of ICs in the  
767 Marschak-Machina triangle (Machina, 1982). Non-linear ICs, compatible with nonlinear probability  
768 weighting, produce different local fanning directions in different areas of the triangle (Fig. 5A)  
769 (Camerer & Ho, 1994; Kontek, Kontek, & Krzysztof, 2018; G. Wu & Gonzalez, 1998).  
770 Furthermore, different stochastic versions of EUT (P. R. Blavatskyy, 2007) and, more in general,  
771 different contributions of noise to the value computation mechanism (Bhatia & Loomes, 2017; Hey  
772 & Orme, 1994; Woodford, 2012) might explain IA violations without nonlinear probability  
773 weighting. These considerations highlight the complexity in the relation between the shape of the  
774 probability weighting function, the pattern of indifference curves and the experimentally revealed  
775 types of IA violations. Further theoretical work and model simulations, which are outside of the  
776 scope of the current work, should help to elucidate these relations.

777 Human tests of the IA describe *Preference Changes* characterized by  $S > 0$  or  $S < 0$  (Allais,  
778 1953; P. Blavatskyy et al., 2022; Starmer, 2000). Because of these violations, many economic  
779 theories have been developed to explain economic choices under risk, including Rank-Dependent  
780 Utility (Quiggin, 1982), Cumulative Prospect Theory (Tversky & Kahneman, 1992), and Target-

781 Adjusted Utility (Schneider & Day, 2016). Consistent with human choices, we found that our  
782 monkeys' choices show both types of violations in the two most studied tests (common  
783 consequence and common ratio). Interestingly, although humans and monkeys may show different  
784 probability weighting functions, the *Preference Changes S* seen in the repeated, stochastic choices  
785 of our monkeys correspond with 70% - 82% accuracy to the S's computed from choices averaged  
786 across human participants (Fig. 7C, D). This result is not only interesting for general inter-species  
787 comparisons but indicates that violations in primates are similar and robust despite methodological  
788 differences, such as trial numbers and averaging within subjects as opposed to across subjects.

789 The IA is arguably the most constrained and direct test that defines Expected Utility, and its  
790 maximization, on a numeric, cardinal scale. With these properties, the IA provides for a stringent  
791 test framework for investigating brain mechanisms of economic choice. So far, human fMRI studies  
792 demonstrate subjective value coding in reward-related brain regions, including the ventral striatum,  
793 midbrain, amygdala, and orbitofrontal and ventromedial prefrontal cortex (Gelskov, Henningson,  
794 Madsen, Siebner, & Ramsøy, 2015; Hsu, Krajbich, Zhao, & Camerer, 2009; Seak, Volkmann,  
795 Pastor-Bernier, Grabenhorst, & Schultz, 2021; S.-W. Wu, Delgado, & Maloney, 2011).  
796 Neurophysiological studies in monkeys demonstrate the coding of subjective value in midbrain  
797 dopamine neurons and orbitofrontal cortex (Kobayashi & Schultz, 2008; Lak, Stauffer, & Schultz,  
798 2014; Padoa-Schioppa & Assad, 2006; Stauffer et al., 2014; Tremblay & Schultz, 1999) and formal  
799 utility coding in dopamine neurons (Stauffer et al., 2014). Further, neurons in monkey orbitofrontal  
800 cortex carry single-dimensional utility signals for two-dimensional choice options designed  
801 according to Revealed Preference Theory (Pastor-Bernier, Stasiak, & Schultz, 2019). However,  
802 despite attempts of economic decision theories to explain IA violations (such as prospect theory),  
803 the neuronal mechanisms underlying IA violations are unknown. To address the issue, an animal  
804 model would be desirable that demonstrates IA violations similar to those seen and analyzed in  
805 humans. Our own studies showed that monkeys' choices follow indifference curves of Revealed  
806 Preference Theory, satisfy first-, second- and third-order stochastic dominance, demonstrate  
807 probability weighting, and comply with the first three EUT axioms (completeness, transitivity,  
808 continuity) (Ferrari-Toniolo et al., 2021, 2019; Genest et al., 2016; Pastor-Bernier et al., 2017;  
809 Stauffer et al., 2015), all of which suggests compliance with fundamental concepts of economic  
810 choice. The current study describes compliance and violation of the fourth EUT axiom, IA, which is  
811 the most demanding and investigated EUT axiom in humans. Tests in rodents have revealed  
812 globally similar IA violations as in humans (Battalio et al., 1985; Kagel et al., 1990), but the results  
813 have so far not been used for neurophysiological investigations in this species. As the performance  
814 of our monkeys in IA tests is also consistent with that in humans, researchers may want to use  
815 neurophysiology in animals to understand neuronal choice mechanisms in humans.

816 Although our study provides systematic and stochastic data on IA violations, there are a few  
817 incompletely addressed directions that can be investigated in the future. For example, further  
818 research may test whether reward magnitude can influence IA violations, as it does in humans (P.  
819 Blavatsky et al., 2022). Further, in the absence of own human data, we can only relate our results  
820 to those from human experiments that did not necessarily have the exact same design. Some of the  
821 observed differences between human's and monkey's IA violations could be due to the unequal  
822 sampling of the probability space across species, with human studies usually focusing on a specific  
823 region of the Marschak-Machina triangle. Our analyses revealed a difference in the magnitude of  
824 the S values between species, together with a minority of incompatible predictions for the  
825 *Preference Change* direction (Fig. 7C, D; confusion matrix and correlation plots). These differences  
826 might reflect the fact that our evaluations depended on the indirect comparison between measured  
827 and predicted Colinsk' S values across species. To more directly compare IA violations between  
828 humans and monkeys (in which neurophysiological studies are more feasible), future studies might

829 adapt our experimental design to that used in humans. We also observed some differences in effect  
830 size between positive and negative S values (Fig. 2), which suggest future investigations of distinct  
831 behavioral strategies leading to violations in different directions. Additionally, future experiments  
832 could investigate different classes of economic models that might capture more reliably the pattern  
833 of IA violations when allowing for the stochasticity of choice (P. R. Blavatskyy & Pogrebna, 2010;  
834 Loomes & Pogrebna, 2014). Our tests might support further development of decision theory and  
835 computer algorithms, for example by using our data for advancing model-free and model-based  
836 reinforcement learning theory into the domain of economic choice research (Daw, Gershman,  
837 Seymour, Dayan, & Dolan, 2011; Miranda, Malalasekera, Behrens, Dayan, & Kennerley, 2020). It  
838 would be interesting to see how subjective values are updated after win or loss trials in IA violated  
839 gambles (model-free: based only on stimuli; model-based: update the whole probability and utility  
840 model; or a combination of both). Neurophysiology research on value updating by reinforcement  
841 could benefit from the developed experimental designs. Thus, because of its multidisciplinary  
842 nature, our current behavioral study may provide the basis for further investigations of behavioral  
843 and neuronal mechanism of economic decision-making under risk.

844

## 845 **References**

846

- 847 Allais, M. (1953). Le Comportement de l'Homme Rationnel devant le Risque: Critique des  
848 Postulats et Axiomes de l'Ecole Americaine. *Econometrica*, 21(4), 503.  
849 <https://doi.org/10.2307/1907921>
- 850 Battalio, R. C., Kagel, J. H., & Jiranyakul, K. (1990). Testing between alternative models of choice  
851 under uncertainty: Some initial results. *Journal of Risk and Uncertainty* 3:1, 3(1), 25–50.  
852 <https://doi.org/10.1007/BF00213259>
- 853 Battalio, R. C., Kagel, J. H., & MacDonald, D. N. (1985). Animals' Choices over Uncertain  
854 Outcomes: Some Initial Experimental Results. *The American Economic Review*, 75(4), 597–  
855 613.
- 856 Bhatia, S., & Loomes, G. (2017). Noisy preferences in risky choice: A cautionary note.  
857 *Psychological Review*, 124(5), 678–687. <https://doi.org/10.1037/rev0000073>
- 858 Blavatskyy, P. (2013). Which decision theory? *Economics Letters*, 120(1), 40–44.  
859 <https://doi.org/10.1016/J.ECONLET.2013.03.039>
- 860 Blavatskyy, P., Ortmann, A., & Panchenko, V. (2015). Now you see it, now you don't: How to  
861 make the Allais paradox appear, disappear, or reverse. *UNSW Business School Research Paper*  
862 *No. 2015-14*, 61(0), 1–24. Retrieved from <https://ssrn.com/abstract=2621917>
- 863 Blavatskyy, P., Ortmann, A., & Panchenko, V. (2022). On the Experimental Robustness of the  
864 Allais Paradox. *American Economic Journal: Microeconomics*, 14(1), 143–163.  
865 <https://doi.org/10.1257/MIC.20190153>
- 866 Blavatskyy, P. R. (2007). Stochastic expected utility theory. *Journal of Risk and Uncertainty*, 34(3),  
867 259–286. <https://doi.org/10.1007/s11166-007-9009-6>
- 868 Blavatskyy, P. R. (2013). The reverse Allais paradox. *Economics Letters*, 119(1), 60–64.  
869 <https://doi.org/10.1016/J.ECONLET.2013.01.009>
- 870 Blavatskyy, P. R., & Pogrebna, G. (2010). Models of stochastic choice and decision theories: why  
871 both are important for analyzing decisions. *Journal of Applied Econometrics*, 25(6), 963–986.  
872 <https://doi.org/10.1002/jae.1116>
- 873 Bordalo, P. (2012). SALIENCE THEORY OF CHOICE UNDER RISK Pedro Bordalo Nicola  
874 Gennaioli Andrei Shleifer. *The Quarterly Journal of Economics*, 1243–1285.  
875 <https://doi.org/10.1093/qje/qjs018>. Advance
- 876 Bujold, P. M., Seak, L. C. U., Schultz, W., & Ferrari-Toniolo, S. (2021). Comparing utility  
877 functions between risky and riskless choice in rhesus monkeys. *Animal Cognition* 2021, 1, 1–  
878 15. <https://doi.org/10.1007/S10071-021-01560-X>

- 879 Camerer, C. F. (1989). An experimental test of several generalized utility theories. *Journal of Risk*  
880 *and Uncertainty*, 2(1), 61–104. <https://doi.org/10.1007/BF00055711>
- 881 Camerer, C. F., & Ho, T.-H. (1994). Violations of the betweenness axiom and nonlinearity in  
882 probability. *Journal of Risk and Uncertainty*, 8(2), 167–196.  
883 <https://doi.org/10.1007/BF01065371>
- 884 Cavagnaro, D. R., Pitt, M. A., Gonzalez, R., & Myung, J. I. (2013). Discriminating among  
885 probability weighting functions using adaptive design optimization. *Journal of Risk and*  
886 *Uncertainty* 2013 47:3, 47(3), 255–289. <https://doi.org/10.1007/S11166-013-9179-3>
- 887 Conlisk, B. J. (1989). Three Variants on the Allais Example. *The American Economic Review*,  
888 79(3), 392–407. Retrieved from [www.jstor.org/stable/1806852](http://www.jstor.org/stable/1806852)
- 889 Daw, N. D., Gershman, S. J., Seymour, B., Dayan, P., & Dolan, R. J. (2011). Model-Based  
890 Influences on Humans' Choices and Striatal Prediction Errors. *Neuron*, 69(6), 1204–1215.  
891 <https://doi.org/10.1016/J.NEURON.2011.02.027>
- 892 Farashahi, S., Azab, H., Hayden, B., & Soltani, A. (2018). On the flexibility of basic risk attitudes  
893 in monkeys. *Journal of Neuroscience*, 38(18), 4383–4398.  
894 <https://doi.org/10.1523/JNEUROSCI.2260-17.2018>
- 895 Ferrari-Toniolo, S., Bujold, P. M., Grabenhorst, F., Báez-Mendoza, R., & Schultz, W. (2021).  
896 Nonhuman Primates Satisfy Utility Maximization in Compliance with the Continuity Axiom  
897 of Expected Utility Theory. *Journal of Neuroscience*, 41(13), 2964–2979.  
898 <https://doi.org/10.1523/JNEUROSCI.0955-20.2020>
- 899 Ferrari-Toniolo, S., Bujold, P. M., & Schultz, W. (2019). Probability distortion depends on choice  
900 sequence in rhesus monkeys. *Journal of Neuroscience*, 39(15), 2915–2929.  
901 <https://doi.org/10.1523/JNEUROSCI.1454-18.2018>
- 902 Gelskov, S. V., Henningson, S., Madsen, K. H., Siebner, H. R., & Ramsøy, T. Z. (2015).  
903 Amygdala signals subjective appetitiveness and aversiveness of mixed gambles. *Cortex*, 66,  
904 81–90. <https://doi.org/10.1016/J.CORTEX.2015.02.016>
- 905 Genest, W., Stauffer, W. R., & Schultz, W. (2016). Utility functions predict variance and skewness  
906 risk preferences in monkeys. *Proceedings of the National Academy of Sciences*, 113(30),  
907 8402–8407. <https://doi.org/10.1073/PNAS.1602217113>
- 908 Gonzalez, R., & Wu, G. (1999). On the Shape of the Probability Weighting Function. *Cognitive*  
909 *Psychology*, 38(1), 129–166. <https://doi.org/10.1006/COGP.1998.0710>
- 910 Harless, B. Y. D. W., & Camerer, C. F. (1994). The Predictive Utility of Generalized Expected  
911 Utility Theories. *Econometrica*, 62(6), 1251–1289. Retrieved from  
912 <https://www.jstor.org/stable/2951749>
- 913 Harman, J. L., & Gonzalez, C. (2015). Allais from Experience: Choice Consistency, Rare Events,  
914 and Common Consequences in Repeated Decisions. *Journal of Behavioral Decision Making*,  
915 28(4), 369–381. <https://doi.org/10.1002/bdm.1855>
- 916 Hey, J. D., & Orme, C. (1994). Investigating Generalizations of Expected Utility Theory Using  
917 Experimental Data. *Econometrica*, 62(6), 1291. <https://doi.org/10.2307/2951750>
- 918 Hsu, M., Krajbich, I., Zhao, C., & Camerer, C. F. (2009). Neural response to reward anticipation  
919 under risk is nonlinear in probabilities. *The Journal of Neuroscience : The Official Journal of*  
920 *the Society for Neuroscience*, 29(7), 2231–2237. <https://doi.org/10.1523/JNEUROSCI.5296-08.2009>
- 922 Huck, S., & Müller, W. (2012). Allais for all: Revisiting the paradox in a large representative  
923 sample. *Journal of Risk and Uncertainty*, 44(3), 261–293. <https://doi.org/10.1007/S11166-012-9142-8/TABLES/13>
- 925 Kagel, B. J. H., Macdonald, D. O. N. N., Battalio, R. C., Kagel, J. H., & Mac, D. N. (1990). Tests  
926 of “Fanning Out” of Indifference Curves: Results from Animal and Human Experiments. *The*  
927 *American Economic Review*, 80(4), 912–921.
- 928 Kahneman, D., & Tversky, A. (1979). Prospect Theory: An Analysis of Decision under Risk.  
929 *Econometrica*, 47(2), 263–292. <https://doi.org/10.2307/1914185>
- 930 Katsikopoulos, K. V, Gigerenzer, G., Katsikopoulos, K. V, & Gigerenzer, G. (2008). One-reason

- 931 decision-making: Modeling violations of expected utility theory. *Journal of Risk and*  
932 *Uncertainty* 2008 37:1, 37(1), 35–56. <https://doi.org/10.1007/S11166-008-9042-0>
- 933 Kobayashi, S., & Schultz, W. (2008). Influence of reward delays on responses of dopamine  
934 neurons. *Journal of Neuroscience*, 28(31), 7837–7846.  
935 <https://doi.org/10.1523/JNEUROSCI.1600-08.2008>
- 936 Kontek, K., Kontek, & Krzysztof. (2018). Boundary effects in the Marschak-Machina triangle.  
937 *Judgment and Decision Making*, 13(6), 587–606. Retrieved from  
938 <https://econpapers.repec.org/RePEc:jdm:journl:v:13:y:2018:i:6:p:587-606>
- 939 Lak, A., Stauffer, W. R., & Schultz, W. (2014). Dopamine prediction error responses integrate  
940 subjective value from different reward dimensions. *Proceedings of the National Academy of*  
941 *Sciences of the United States of America*, 111(6), 2343–2348.  
942 <https://doi.org/10.1073/pnas.1321596111>
- 943 List, J. A., & Haigh, M. S. (2005). A simple test of expected utility theory using professional  
944 traders. *Proceedings of the National Academy of Sciences of the United States of America*,  
945 102(3), 945–948. <https://doi.org/10.1073/pnas.0408022101>
- 946 Loomes, G., & Pogrebna, G. (2014). Testing for independence while allowing for probabilistic  
947 choice. *Journal of Risk and Uncertainty*, 49(3), 189–211. [https://doi.org/10.1007/S11166-014-](https://doi.org/10.1007/S11166-014-9205-0/TABLES/8)  
948 [9205-0/TABLES/8](https://doi.org/10.1007/S11166-014-9205-0/TABLES/8)
- 949 Loomes, G., & Sugden, R. (1987). Testing for Regret and Disappointment in Choice Under  
950 Uncertainty. *The Economic Journal*, 97(May), 118. <https://doi.org/10.2307/3038234>
- 951 Loubergé, H., & Outreville, J. F. (2011). Risk taking in the domain of losses: experiments in several  
952 countries. [Http://Dx.Doi.Org/10.1080/13669870010016930](http://Dx.Doi.Org/10.1080/13669870010016930), 4(3), 227–236.  
953 <https://doi.org/10.1080/13669870010016930>
- 954 Machina, M. J. (1982). “Expected Utility” Analysis without the Independence Axiom.  
955 *Econometrica*, 50(2), 277. <https://doi.org/10.2307/1912631>
- 956 Marschak, J. (1950). Rational Behavior, Uncertain Prospects, and Measurable Utility.  
957 *Econometrica*, 18(2), 111. <https://doi.org/10.2307/1907264>
- 958 McFadden, D. (2001). Economic Choices. *American Economic Review*, 91(3), 351–378.  
959 <https://doi.org/10.1257/aer.91.3.351>
- 960 Miranda, B., Malalasekera, W. M. N., Behrens, T. E., Dayan, P., & Kennerley, S. W. (2020).  
961 Combined model-free and model-sensitive reinforcement learning in non-human primates.  
962 *PLOS Computational Biology*, 16(6), e1007944.  
963 <https://doi.org/10.1371/JOURNAL.PCBI.1007944>
- 964 Moscati, I. (2016). Retrospectives: How economists came to accept expected utility theory: The  
965 case of samuelson and savage. *Journal of Economic Perspectives*, 30(2), 219–236.  
966 <https://doi.org/10.1257/jep.30.2.219>
- 967 Padoa-Schioppa, C., & Assad, J. A. (2006). Neurons in the orbitofrontal cortex encode economic  
968 value. *Nature*, 441(7090), 223–226. <https://doi.org/10.1038/nature04676>
- 969 Pastor-Bernier, A., Plott, C. R., & Schultz, W. (2017). Monkeys choose as if maximizing utility  
970 compatible with basic principles of revealed preference theory. *Proceedings of the National*  
971 *Academy of Sciences*, 114(10), E1766–E1775. <https://doi.org/10.1073/PNAS.1612010114>
- 972 Pastor-Bernier, A., Stasiak, A., & Schultz, W. (2019). Orbitofrontal signals for two-component  
973 choice options comply with indifference curves of Revealed Preference Theory. *Nature*  
974 *Communications* 2019 10:1, 10(1), 1–19. <https://doi.org/10.1038/s41467-019-12792-4>
- 975 Pelé, M., Broihanne, M. H., Thierry, B., Call, J., & Dufour, V. (2014). To bet or not to bet?  
976 Decision-making under risk in non-human primates. *Journal of Risk and Uncertainty*, 49(2),  
977 141–166. <https://doi.org/10.1007/S11166-014-9202-3/TABLES/9>
- 978 Prelec, D. (1998). The Probability Weighting Function. *Econometrica*, 66(3), 497.  
979 <https://doi.org/10.2307/2998573>
- 980 Quiggin, J. (1982). A theory of anticipated utility. *Journal of Economic Behavior and Organization*,  
981 Vol. 3, pp. 323–343. [https://doi.org/10.1016/0167-2681\(82\)90008-7](https://doi.org/10.1016/0167-2681(82)90008-7)
- 982 Ruggeri, K., Alí, S., Berge, M. L., Bertoldo, G., Bjørndal, L. D., Cortijos-Bernabeu, A., ... Folke,

- 983 T. (2020). Replicating patterns of prospect theory for decision under risk. *Nature Human*  
984 *Behaviour*, 4(6), 622–633. <https://doi.org/10.1038/s41562-020-0886-x>
- 985 Savage, L. (1954). The foundations of Statistics. In *The Housing Debate*.  
986 <https://doi.org/10.1332/policypress/9781847422736.003.0001>
- 987 Schneider, M., & Day, R. (2016). Target-Adjusted Utility Functions and Expected-Utility  
988 Paradoxes. <https://doi.org/10.1287/Mnsc.2016.2588>, 64(1), 271–287.  
989 <https://doi.org/10.1287/MNSC.2016.2588>
- 990 Seak, L. C. U., Volkmann, K., Pastor-Bernier, A., Grabenhorst, F., & Schultz, W. (2021). Single-  
991 Dimensional Human Brain Signals for Two-Dimensional Economic Choice Options. *Journal*  
992 *of Neuroscience*, 41(13), 3000–3013. <https://doi.org/10.1523/JNEUROSCI.1555-20.2020>
- 993 Spitmaan, M., Chu, E., & Soltani, A. (2019). Saliency-driven value construction for adaptive choice  
994 under risk. *Journal of Neuroscience*, 39(26), 5195–5209.  
995 <https://doi.org/10.1523/JNEUROSCI.2522-18.2019>
- 996 Starmer, C. (2000). Developments in nonexpected-utility theory: The hunt for a descriptive theory  
997 of choice under risk. *Advances in Behavioral Economics*, XXXVIII(June), 332–382.
- 998 Stauffer, W. R., Lak, A., Bossaerts, P., & Schultz, W. (2015). Economic choices reveal probability  
999 distortion in macaque monkeys. *Journal of Neuroscience*, 35(7), 3146–3154.  
1000 <https://doi.org/10.1523/JNEUROSCI.3653-14.2015>
- 1001 Stauffer, W. R., Lak, A., & Schultz, W. (2014). Dopamine reward prediction error responses reflect  
1002 marginal utility. *Current Biology*, 24(21), 2491–2500.  
1003 <https://doi.org/10.1016/j.cub.2014.08.064>
- 1004 Stott, H. P. (2006). Cumulative prospect theory's functional menagerie. *Journal of Risk and*  
1005 *Uncertainty*, 32(2), 101–130. <https://doi.org/10.1007/s11166-006-8289-6>
- 1006 Tremblay, L., & Schultz, W. (1999). Relative reward preference in primate orbitofrontal cortex.  
1007 *Nature*, 398(6729), 704–708. <https://doi.org/10.1038/19525>
- 1008 Tversky, A., & Kahneman, D. (1992). Advances in prospect theory: Cumulative representation of  
1009 uncertainty. *Journal of Risk and Uncertainty*, 5(4), 297–323.  
1010 <https://doi.org/10.1007/BF00122574>
- 1011 von Neumann, J., & Morgenstern, O. (1944). Theory of Games and Economic Behavior. *Princeton*  
1012 *University Press*, 625. <https://doi.org/10.1177/1468795X06065810>
- 1013 Woodford, M. (2012). Prospect theory as efficient perceptual distortion. *American Economic*  
1014 *Review*. <https://doi.org/10.1257/aer.102.3.41>
- 1015 Wu, G., & Gonzalez, R. (1998). Common Consequence Conditions in Decision Making under Risk.  
1016 *Journal of Risk and Uncertainty* 1998 16:1, 16(1), 115–139.  
1017 <https://doi.org/10.1023/A:1007714509322>
- 1018 Wu, S.-W., Delgado, M. R., & Maloney, L. T. (2011). The Neural Correlates of Subjective Utility  
1019 of Monetary Outcome and Probability Weight in Economic and in Motor Decision under Risk.  
1020 *Journal of Neuroscience*, 31(24), 8822–8831. [https://doi.org/10.1523/JNEUROSCI.0540-](https://doi.org/10.1523/JNEUROSCI.0540-11.2011)  
1021 [11.2011](https://doi.org/10.1523/JNEUROSCI.0540-11.2011)
- 1022

1023 **Tables**

1024 **Table 1.** *Preference Reversals* while testing the independence axiom.

|             | Test | <i>Preference Reversal</i> |      |
|-------------|------|----------------------------|------|
| Monkey<br>A | CC   | $A > B \Rightarrow C < D$  | 0/18 |
|             |      | $A < B \Rightarrow C > D$  | 5/18 |
|             | CR   | $A > B \Rightarrow C < D$  | 0/18 |
|             |      | $A < B \Rightarrow C > D$  | 3/18 |
| Monkey<br>B | CC   | $A > B \Rightarrow C < D$  | 1/18 |
|             |      | $A < B \Rightarrow C > D$  | 0/18 |
|             | CR   | $A > B \Rightarrow C < D$  | 0/18 |
|             |      | $A < B \Rightarrow C > D$  | 0/18 |
| Monkey<br>C | CC   | $A > B \Rightarrow C < D$  | 0/18 |
|             |      | $A < B \Rightarrow C > D$  | 0/18 |
|             | CR   | $A > B \Rightarrow C < D$  | 0/18 |
|             |      | $A < B \Rightarrow C > D$  | 0/18 |

1025 CC: common consequence test, CR: common ratio test.  $x > y$  indicates 'x preferred to y',  $x < y$   
 1026 indicates 'y preferred to x'.  $A > B$  leading to  $C < D$  constitutes a stochastic Allais-type *Preference*  
 1027 *Reversal*, as indicated by significant probability of choice:  $P(C|\{C,D\}) < 0.5$  (statistical  $P < 0.05$ ; 1-  
 1028 tailed; binomial test) (see Eq. 2). By contrast,  $A < B$  leading to  $C > D$  constitutes a stochastic  
 1029 reverse Allais-type *Preference Reversal*:  $(P(D|\{C,D\})) < 0.5$  (statistical  $P < 0.05$ ) (see Eq. 3).

1030



1031

1032 **Table 2.** *Preference Changes* while testing the independence axiom.

|             | Test | <i>Preference Change</i> |       |
|-------------|------|--------------------------|-------|
| Monkey<br>A | CC   | $S > 0$                  | 1/18  |
|             |      | $S < 0$                  | 8/18  |
|             | CR   | $S > 0$                  | 1/18  |
|             |      | $S < 0$                  | 11/18 |
| Monkey<br>B | CC   | $S > 0$                  | 2/18  |
|             |      | $S < 0$                  | 3/18  |
|             | CR   | $S > 0$                  | 2/18  |
|             |      | $S < 0$                  | 5/18  |
| Monkey<br>C | CC   | $S > 0$                  | 2/18  |
|             |      | $S < 0$                  | 6/18  |
|             | CR   | $S > 0$                  | 1/18  |
|             |      | $S < 0$                  | 8/18  |

1033 CC: common consequence test, CR: common ratio test. *Preference Changes* were measured as real-  
 1034 number S based on a modification of Conlisk'S (see Eqs. 4 - 6) and tested for significance at  $P <$   
 1035 0.05 (one-sample t-test against zero). *Preference Changes* represent IA violations for CC tests but  
 1036 are only necessary and not sufficient for claiming IA violations in CR tests.

1037 **Figures**

1038

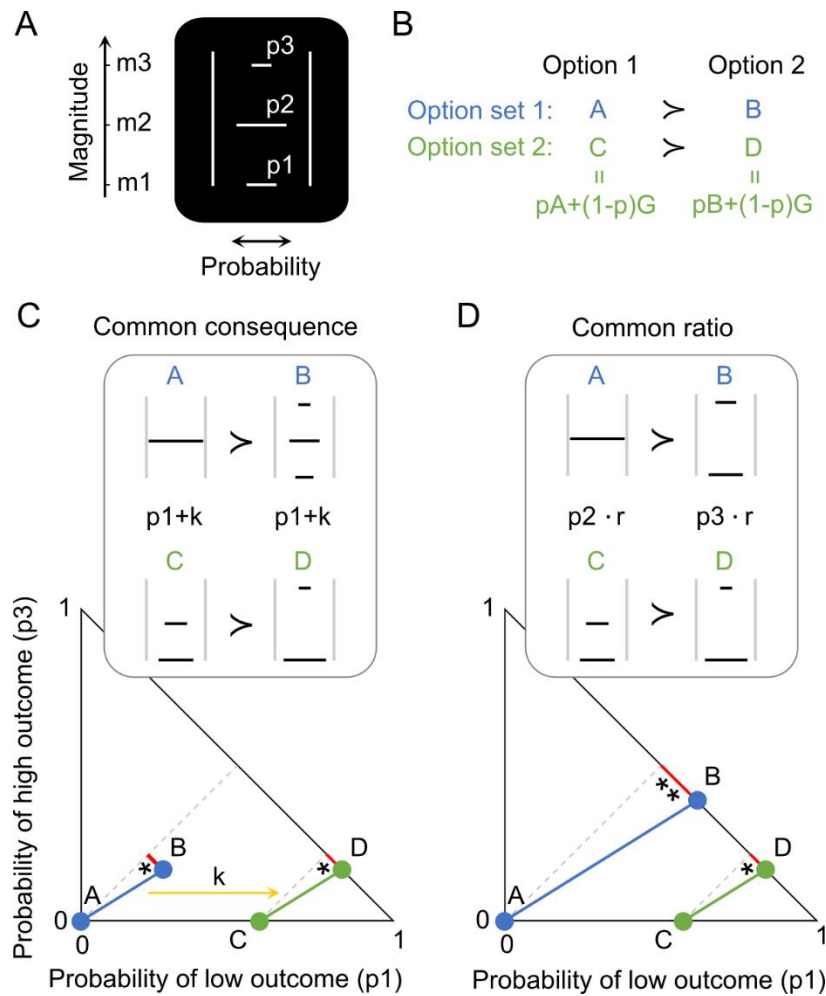

1039

1040

1041

1042

1043

1044

1045

1046

1047

1048

1049

1050

1051

1052

1053

1054

1055

1056

1057

1058

1059

1060

1061

**Fig. 1.** Experimental design for testing the independence axiom (IA).

(A) Visual stimulus predicting a three-outcome gamble. The vertical position of each horizontal bar represents reward amount ( $m1$ ,  $m2$ ,  $m3$ ; ml of juice); the length of each bar represents reward probability ( $p1$ ,  $p2$ ,  $p3$ ) of the respective amounts  $m1$ ,  $m2$ ,  $m3$ .

(B) Principle of testing the IA with two option sets  $\{A,B\}$  and  $\{C,D\}$ . Options C and D are obtained by adding the same gamble G to both options A and B, weighted by probability p.

(C) Common consequence test and its representation in the Marschak-Machina triangle. The x- and y-axes represent the probabilities of the low outcome ( $p1$ ) and high outcome ( $p3$ ), respectively (probability of middle outcome:  $p2 = 1 - p1 - p3$ ). Blue dots represent the original option set  $\{A,B\}$ , and green dots represent its modified set  $\{C,D\}$  for testing the IA. The yellow arrow indicates how option set  $\{A,B\}$  becomes option set  $\{C,D\}$  by adding the same probability k to the probability  $p1$  of the low outcome  $m1$  in both gambles A and B. Grey lines connect gambles with same expected value and highlight the linear and parallel nature of indifference curves tested by the IA. IA compliance requires same preferences: if  $(A > B)$  then  $(C > D)$ , or if  $(A < B)$  then  $(C < D)$  and same choice probabilities.

(D) Common ratio test. Multiplication of option set  $\{A,B\}$  by the same ratio r results in test option set  $\{C,D\}$ . Option set  $\{A,B\}$  becomes option set  $\{C,D\}$  by multiplying a common ratio r with the probability of the middle outcome ( $p2$ ) of gamble A and with the probability of the high outcome ( $p3$ ) of gamble B. \* and \*\* and lengths of red lines indicate different distances of gambles from expected values (grey lines), which may result in potential preference changes between the two option sets without necessarily indicating IA violation.

1062

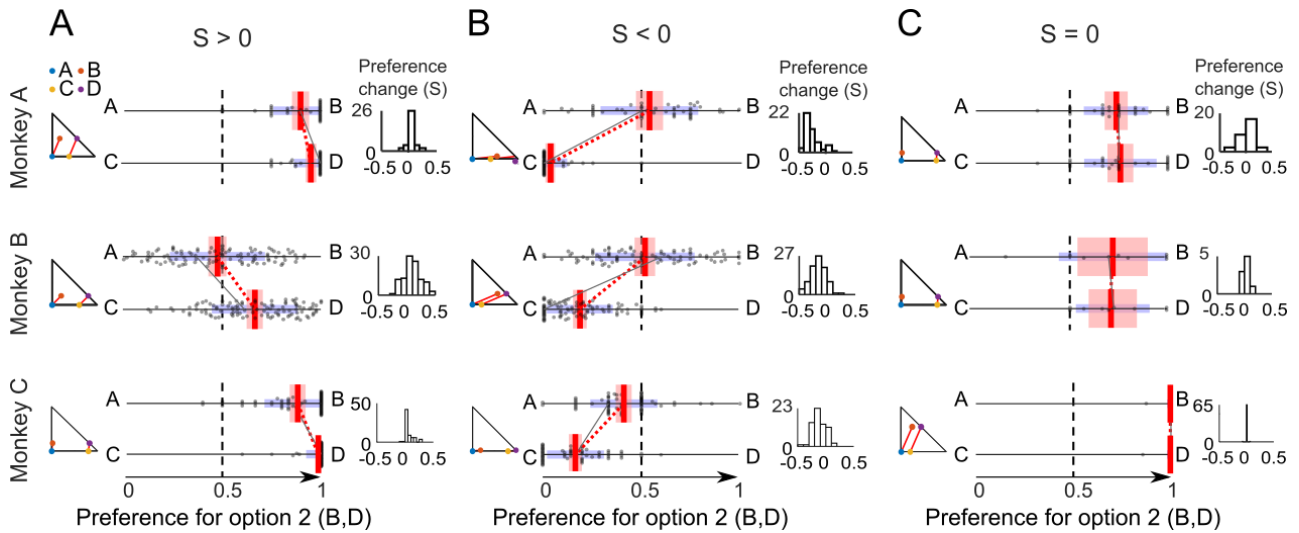

1063

1064

1065

1066

1067

1068

1069

1070

1071

1072

1073

1074

1075

1076

1077

**Fig. 2.** Preference Changes  $S$  during IA common consequence tests.

(A) Significant violations with positive Preference Change measure  $S$  ( $P < 0.05$  on pooled sessions from a given monkey; one-sample t-test against zero). Each panel shows at the left the small Marschak-Machina triangle for the tested options. The center plot shows the probability of choosing one option over the other option (Options A and C on the left; Options B and D on the right). Each dot represents the probability of choosing A over B or C over D in one session; red vertical bars represent averages of probability of choices (A - B or C - D) across sessions; red intervals show the 95% confidence interval; blue intervals show Standard Deviations (SD); the black line links preferences in one example session (red dotted line: average across sessions). Small histograms (right) show the distribution of  $S$ 's that quantifies the IA violation, across sessions.

(B) Significant negative Preference Changes  $S$ .

(C) Insignificant Preference Changes  $S$ .

1078

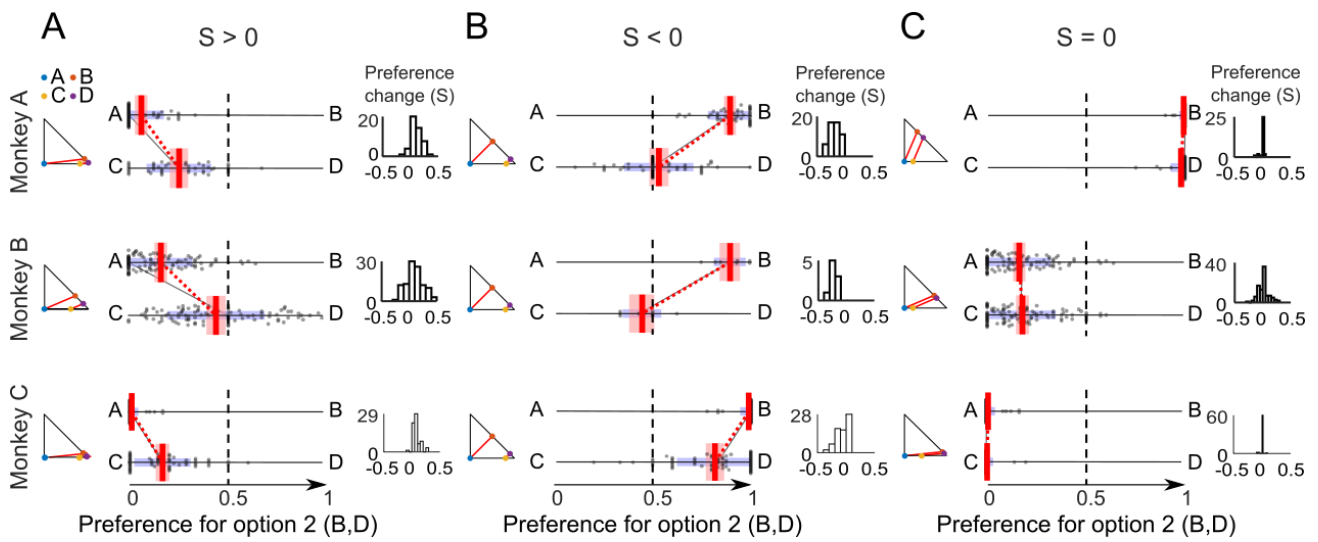

1079

1080

1081

1082

1083

1084

1085

1086

**Fig. 3.** Preference Changes ( $S$ ) during IA common ratio tests.

(A) Significant positive Preference Change measure  $S$  (all  $P < 0.05$ ; one-sample t-test). For conventions, see Fig. 2.

(B) Significant negative Preference Changes  $S$ .

(C) Insignificant Preference Changes  $S$ .

1087

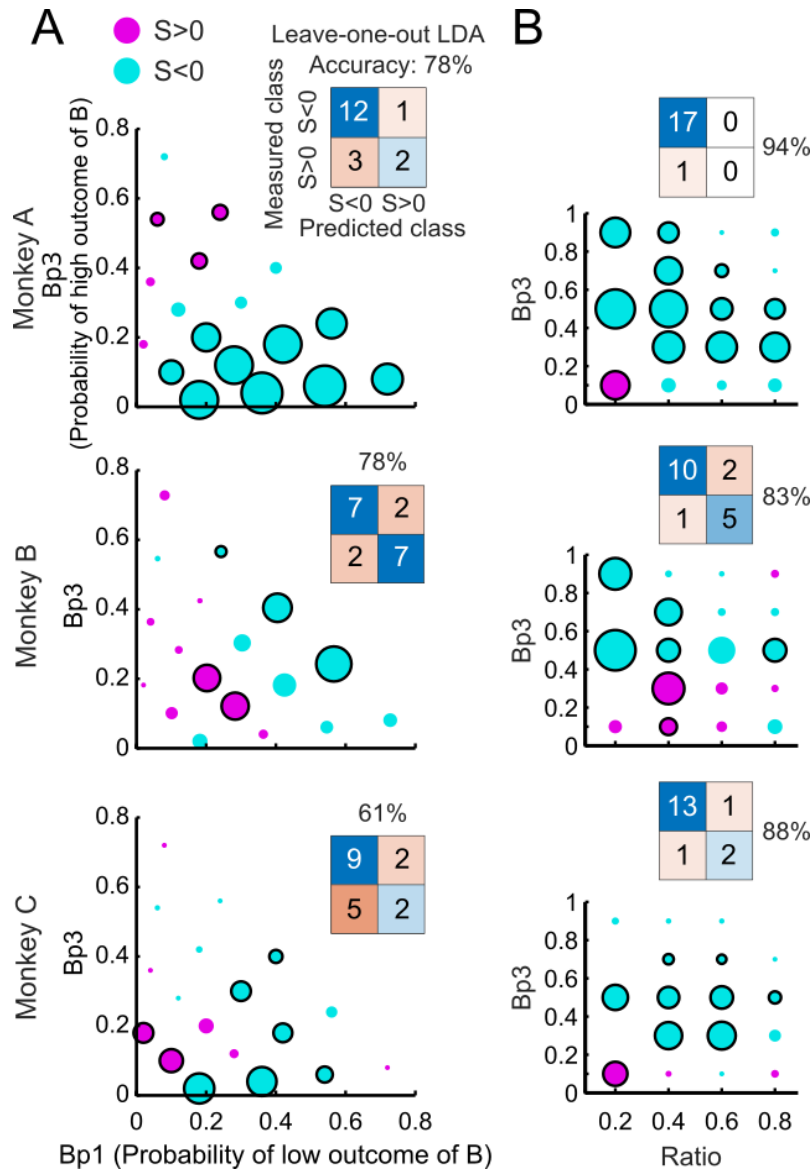

1088  
1089

1090

1091

1092

1093

1094

1095

1096

1097

1098

**Fig. 4.** Probability dependency of IA Preference Changes.

(A) Common consequence test. The x- and y-axes show the probabilities of low and high magnitudes of option B, respectively. Purple and cyan dots represent positive and negative Preference Change measures  $S$ , respectively. Black circles around dots indicate significance ( $P < 0.05$ ; one-sample t-test). Insets show confusion matrices from classifications using Linear Discriminant Analysis (LDA).

(B) Common ratio test. The x- and y-axes show the ration and the probability of high magnitudes of option B, respectively. One option set with  $S = 0$  not shown in Monkey C.

1099

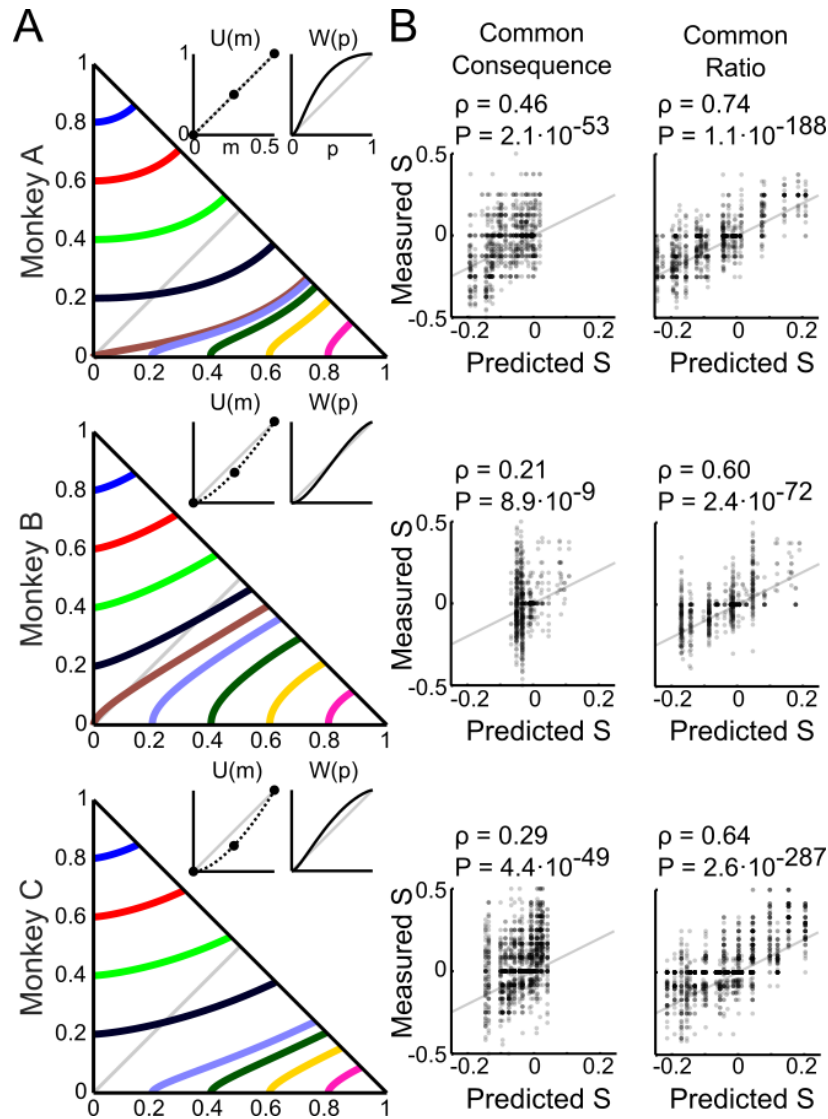

1100

1101

1102

1103

1104

1105

1106

1107

1108

1109

1110

1111

1112

**Fig. 5.** Cumulative prospect theory (CPT) modeling can explain the measured *Preference Changes*. (A) Choice indifference curves (ICs) in the Marschak-Machina triangle. Each line represents one IC, and all gambles on a given line are equally preferred to each other. Insets show estimated utility and probability weighting functions, using the CPT model, from all trials (common ratio and common consequence tests). The three monkeys had individually differing, mostly non-linear utility and probability weighting functions. Note that utility functions were only estimated for three points (black dots), which were the only three magnitudes used in the experiment ( $m1$ ,  $m2$ ,  $m3$ ); thus, the dashed lines do not represent the full shape of the utility function. (B) Pearson correlations between measured S's and S's predicted by the CPT-modeled utility and probability weighting functions for the common consequence and common ratio tests.

1113

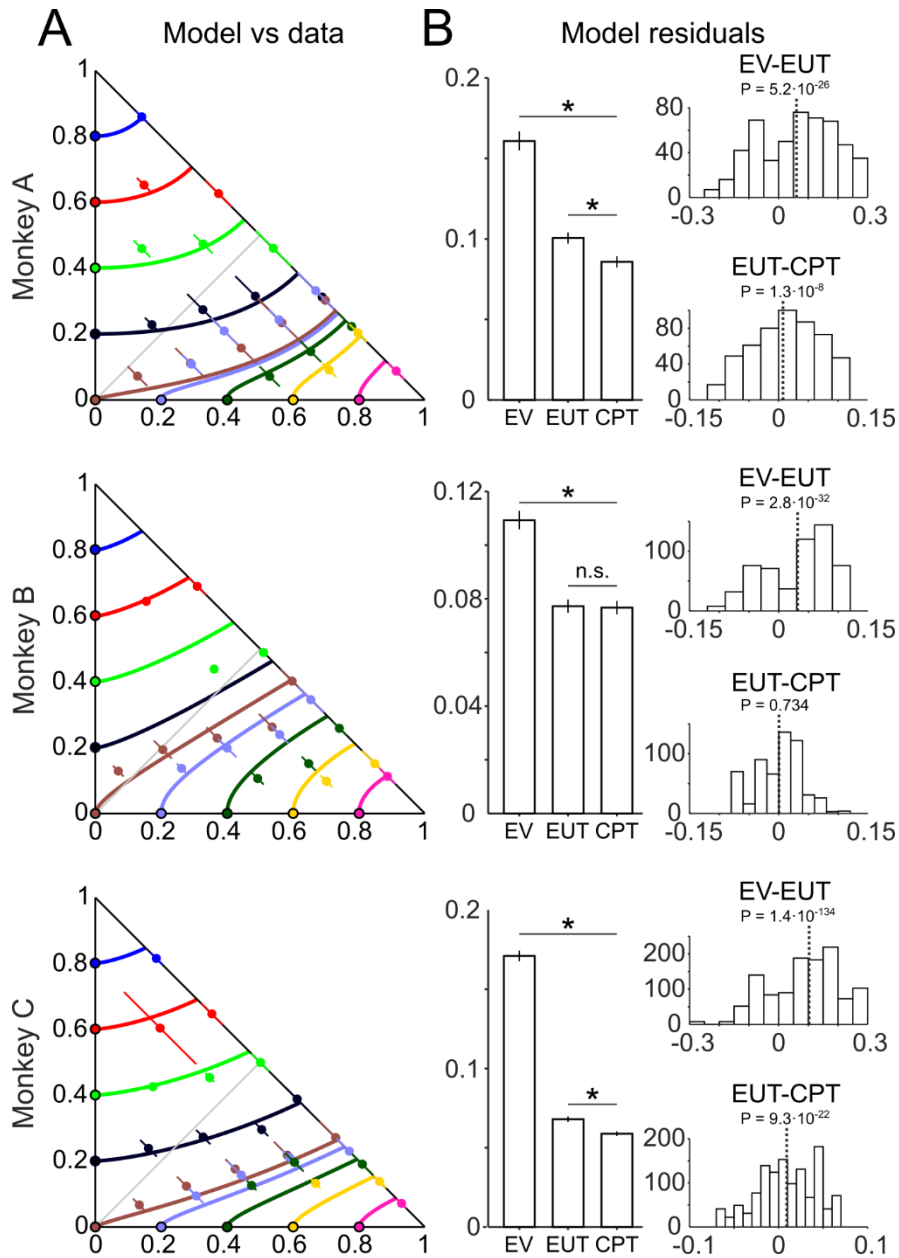

1114  
1115

**Fig. 6.** Out-of-sample tests on indifference curves (ICs) modeled by Cumulative Prospect Theory (CPT).

1118 (A) Close relationship between measured out-of-sample indifference points (IP, colored dots) and  
1119 ICs modeled by CPT (colored lines) in common ratio and common consequence tests. Colored dots  
1120 show mean IPs across all sessions, corresponding to the same-colored ICs; lines show Standard  
1121 Deviations (SD) of IPs across all sessions.

1122 (B) Left: bar charts of means and Standard Errors of the Mean (SEM) of model residuals (distances  
1123 between model ICs and the measured out-of-sample IPs). Asterisks:  $P < 0.05$  in post-hoc paired t-  
1124 test (n.s.: not significant,  $P > 0.05$ ). Right: residual differences from different models (means from  
1125 individual sessions; top: Expected Value (EV) minus Expected Utility Theory (EUT); bottom: EUT  
1126 minus CPT. Dotted line: mean value;  $P$ : post-hoc paired t-test p-value. Smaller residuals for CPT  
1127 than EUT or EV indicate that CPT better captured the pattern of the measured out-of-sample IPs.  
1128

1129

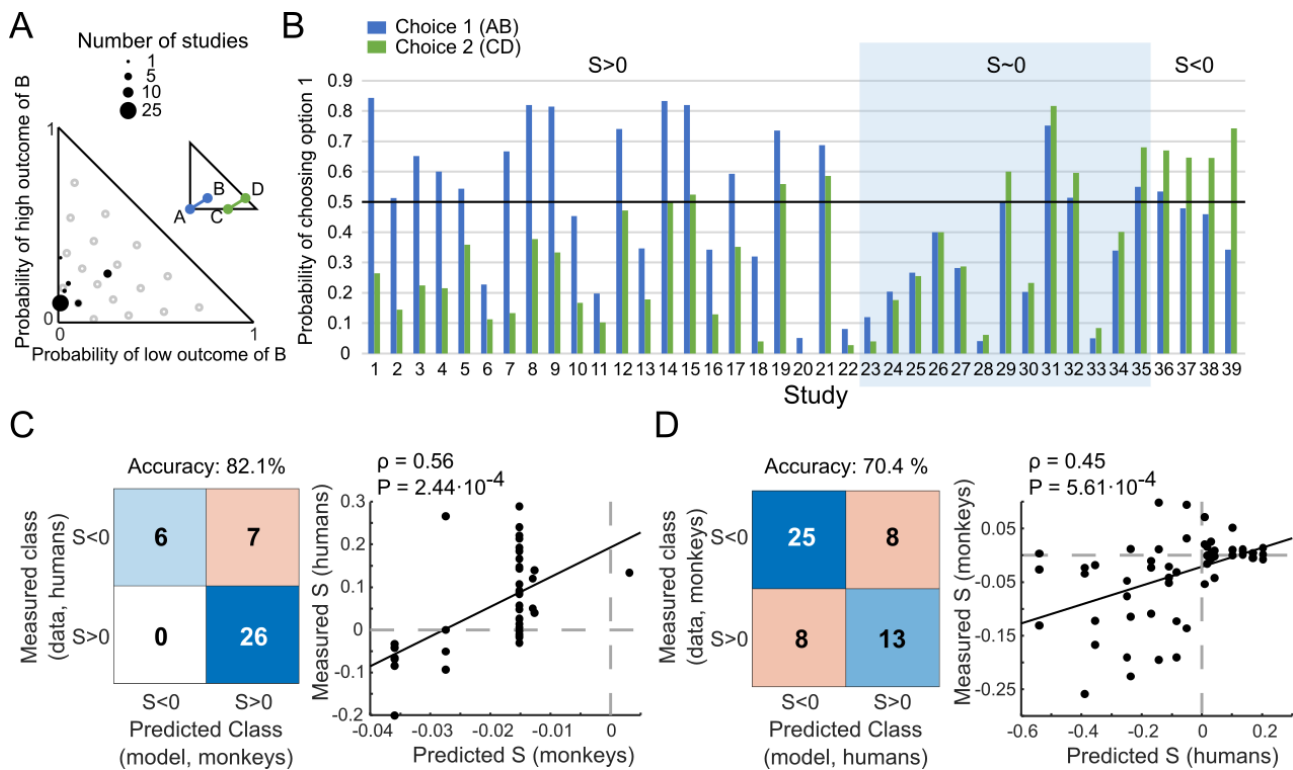

1130

1131

1132

1133

1134

1135

1136

1137

1138

1139

1140

1141

1142

1143

1144

1145

1146

1147

1148

1149

1150

**Fig. 7. Correspondence of Preference Changes S between monkeys and humans.**

(A) Gamble positions in the Marschak-Machina triangle of 39 independent human common consequence studies (P. Blavatsky et al., 2015). The x-axis represents the probability of getting the low outcome in option B and the y-axis represents the probability of getting the high outcome in option B (see option B in Fig. 1D). The diagram illustrates the location of the reward probability tested in the human studies (black dots). Gray circles correspond to the CC tests we performed on monkeys in the current study.

(B) Results from the 39 human studies. Blue and green bars refer to option sets 1 {A, B} and 2 {C, D}, respectively (see Fig. 1B). The y-axis indicates the probability of choosing option 1 (A or C).

(C) Correspondence between measured human S's (39 studies; B) and predicted monkey S's. Left: confusion matrix of classes of human S's and classes of monkey S's predicted from actually used monkey gambles by Linear Discriminant Analysis (LDA). The LDA prediction of monkey S's allowed comparison of same gambles between the two species. Right: Pearson correlation between measured human S's and monkey S's predicted by regression (Eq. 18, 19), using the same gambles.

(D) Correspondence between measured monkey S's and predicted human S's. This inverse control test relative to the test shown in C was based on the actual gambles used in monkeys and employed predictions of human S's for these gambles via different LDA and regression (Eqs. 20, 21; see Methods).



1151 Supplementary Figures for:

1152

1153 **Risky choice: probability weighting explains Independence Axiom violations in monkeys**

1154

1155 **Simone Ferrari-Toniolo\*, Leo Chi U Seak\*, Wolfram Schultz**

1156 Department of Physiology, Development and Neuroscience

1157 University of Cambridge, Cambridge, UK

1158

1159 Corresponding author email: [Simone.ferraritoniolo@gmail.com](mailto:Simone.ferraritoniolo@gmail.com)

1160

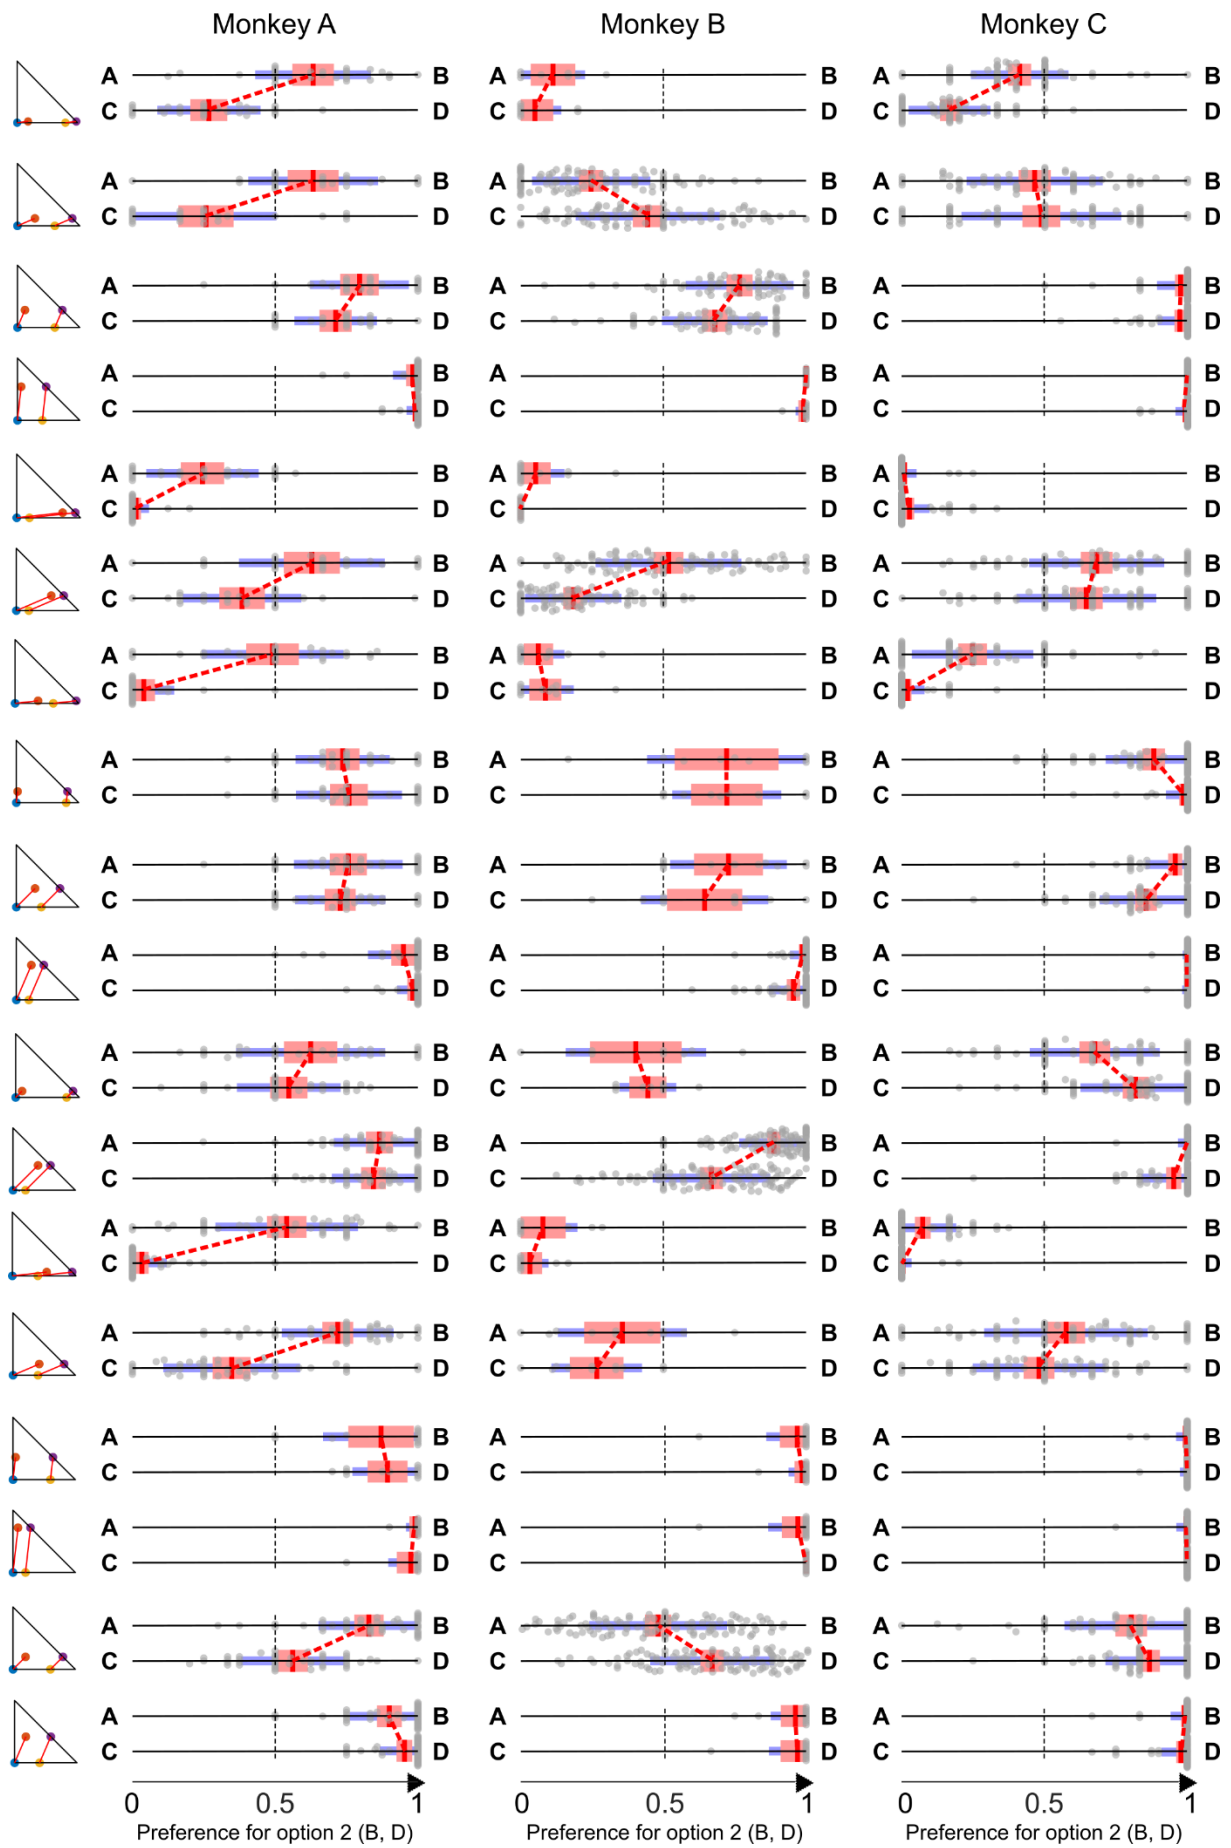

1161  
1162  
1163  
1164

**Supplementary Fig. 1.** Preference Changes S for all common consequence tests. For conventions, see Fig. 2.

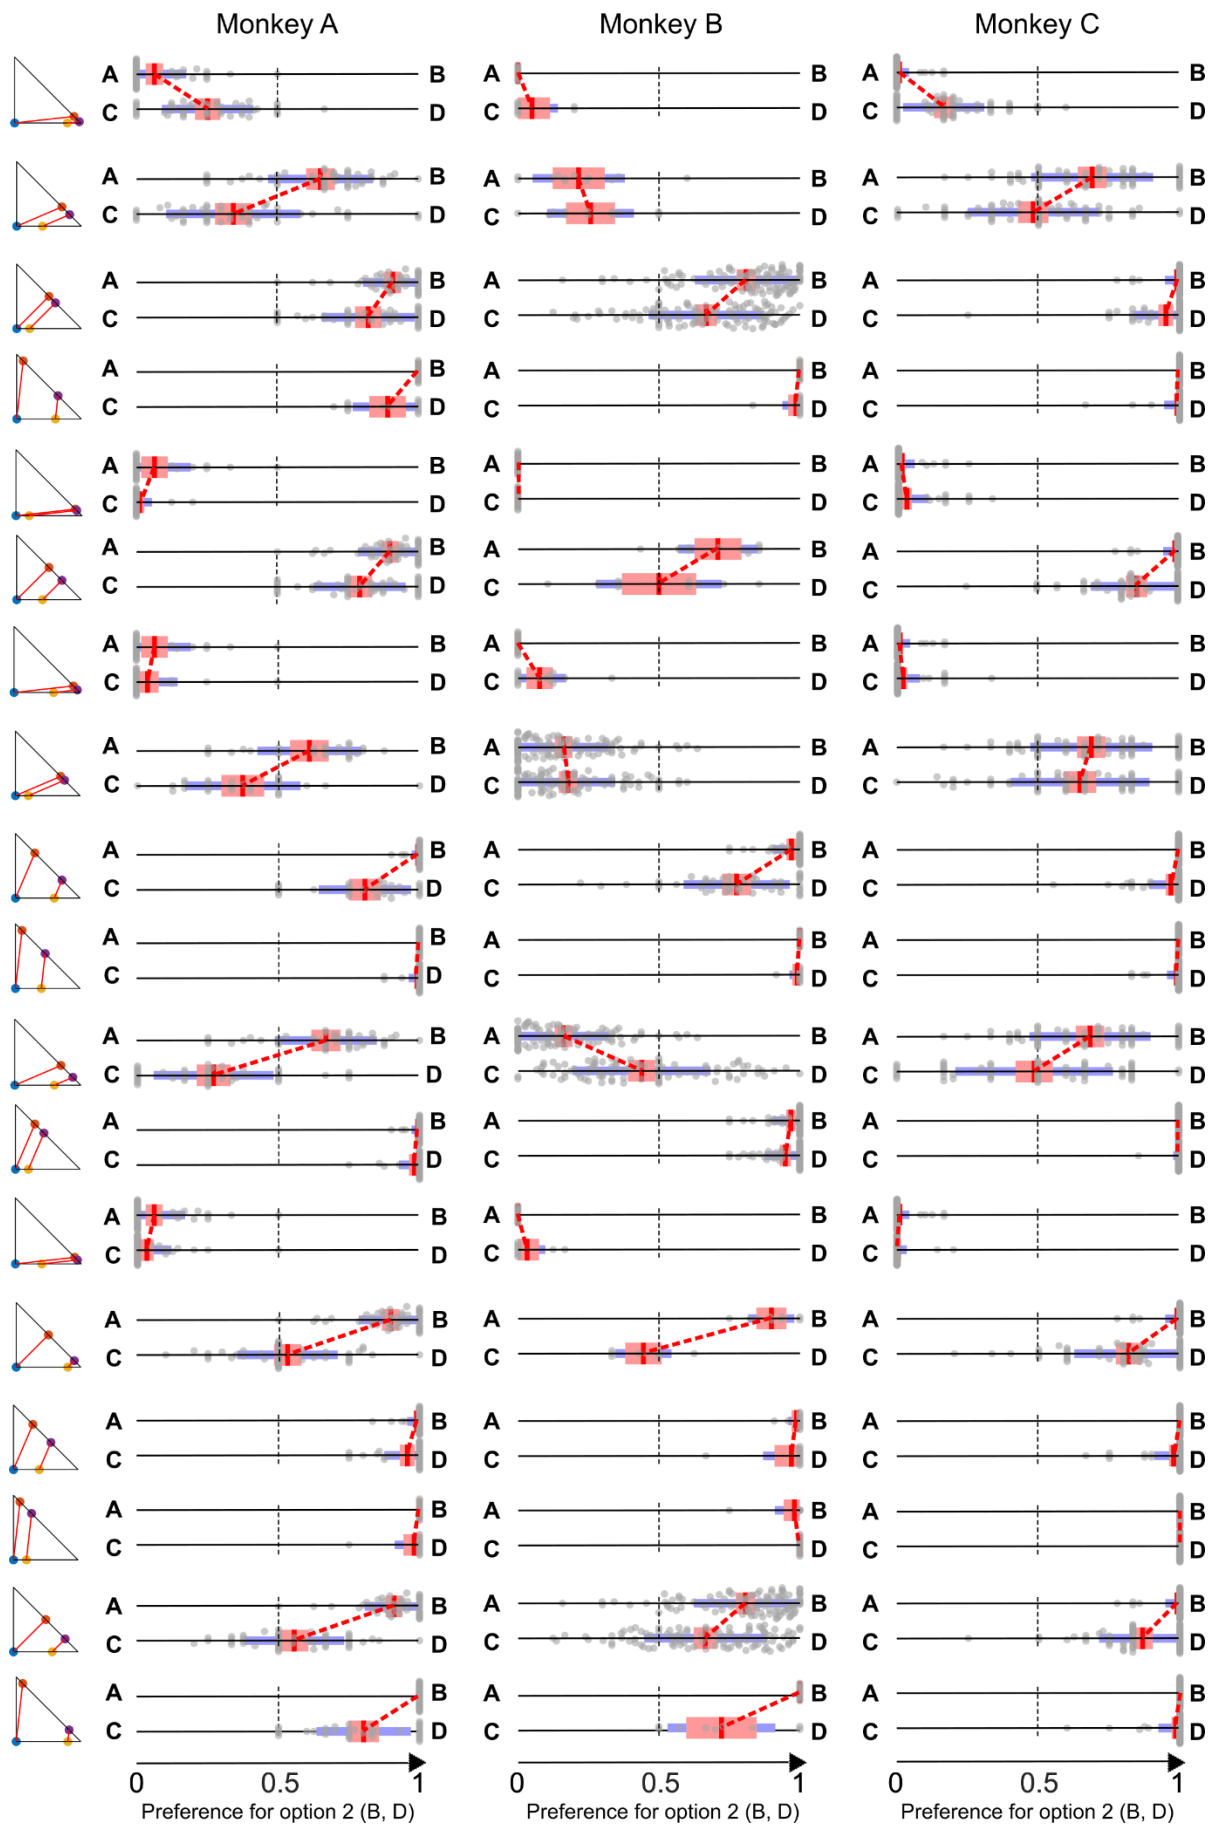

1165  
1166  
1167  
1168

**Supplementary Fig. 2.** Preference Changes S for all common ratio tests. For conventions, see Fig. 2.

1169

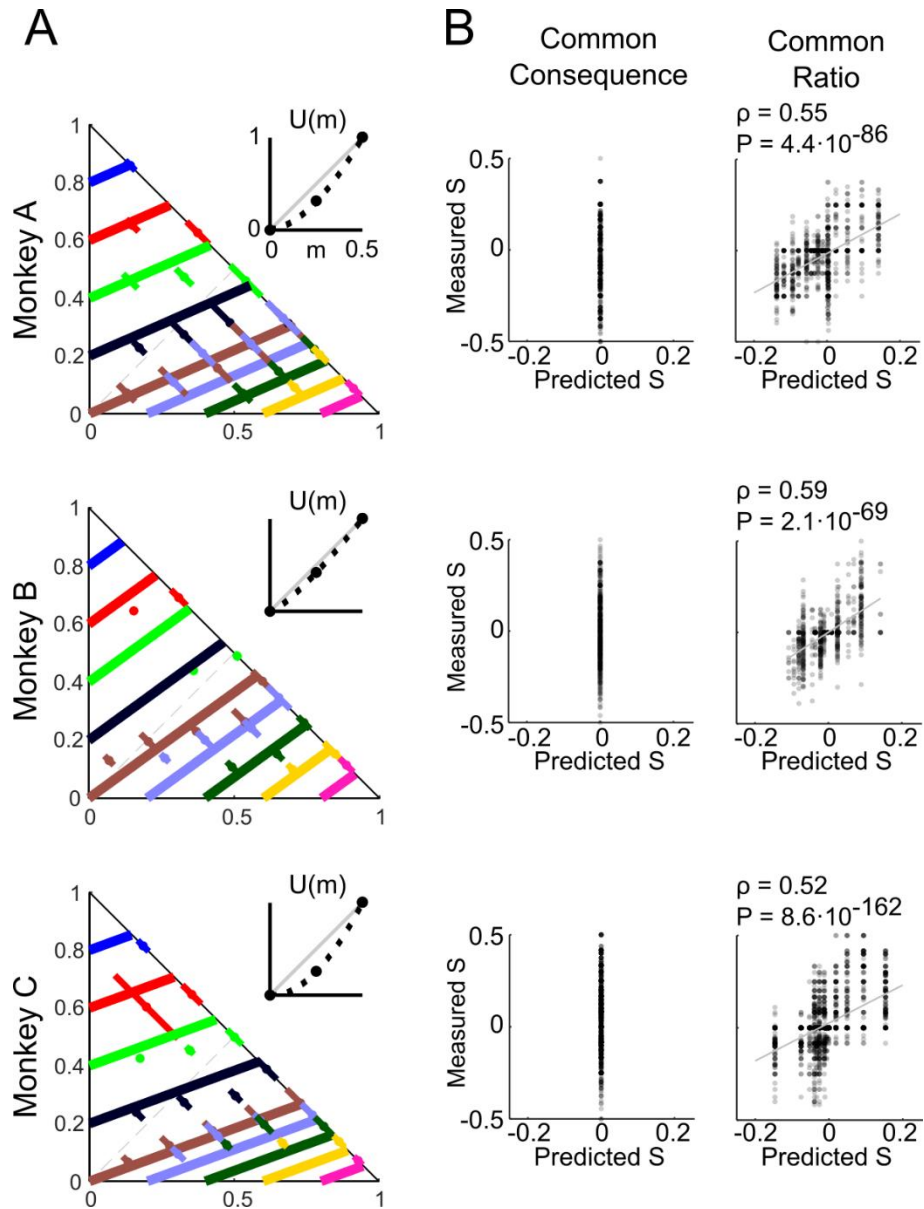

1170

1171

1172

1173

1174

1175

**Supplementary Fig. 3.** Expected Utility Theory (EUT) modeling failed to explain the common consequence (CC) test but can predict the Preference Changes of the common ratio (CR) test to some degree. For conventions, see Fig. 6.

1176

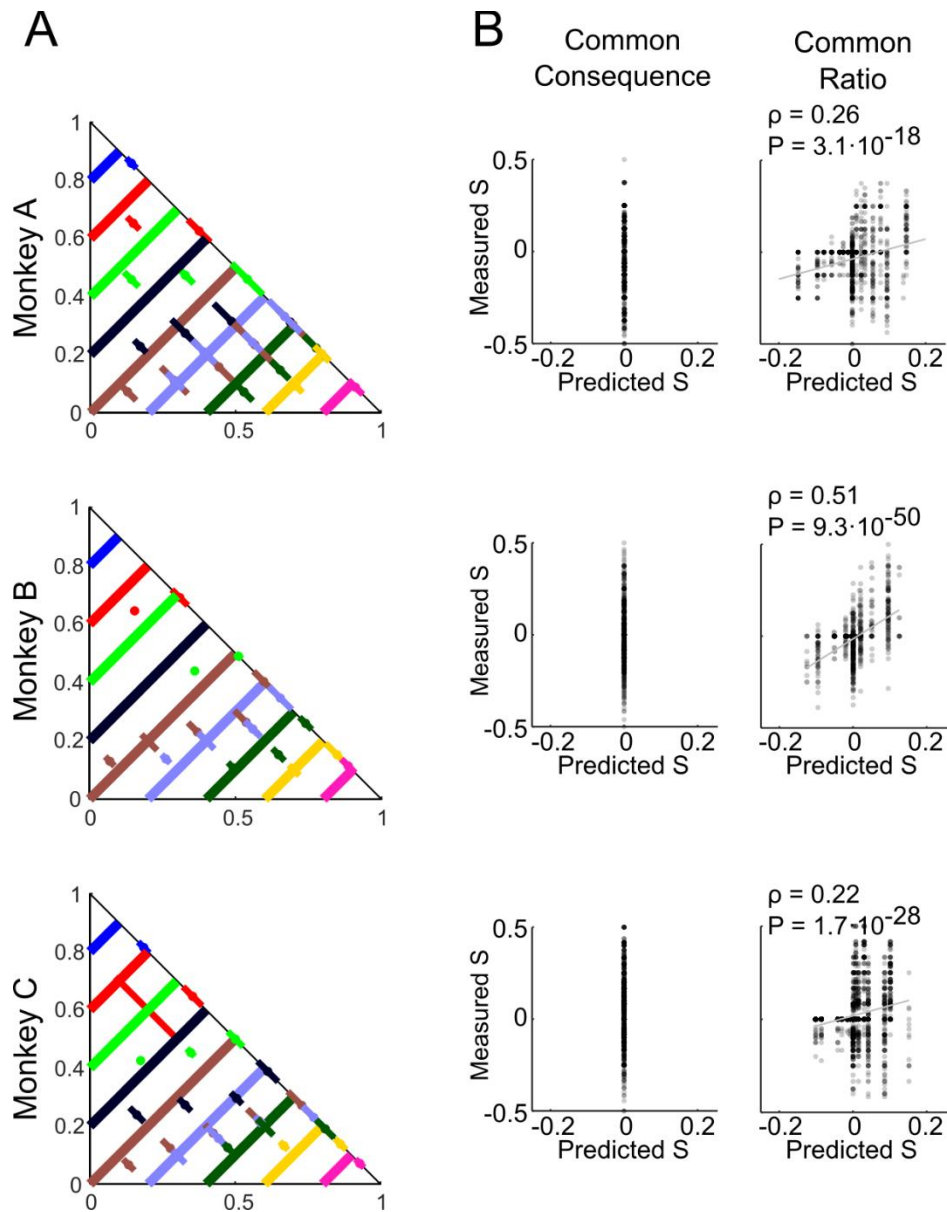

1177

1178

1179

1180

1181

1182

**Supplementary Fig. 4.** Expected Value (EV) modeling failed to explain the common consequence (CC) test but can predict the Preference Changes of the common ratio (CR) to some degree. For conventions, see Fig. 6.

1183

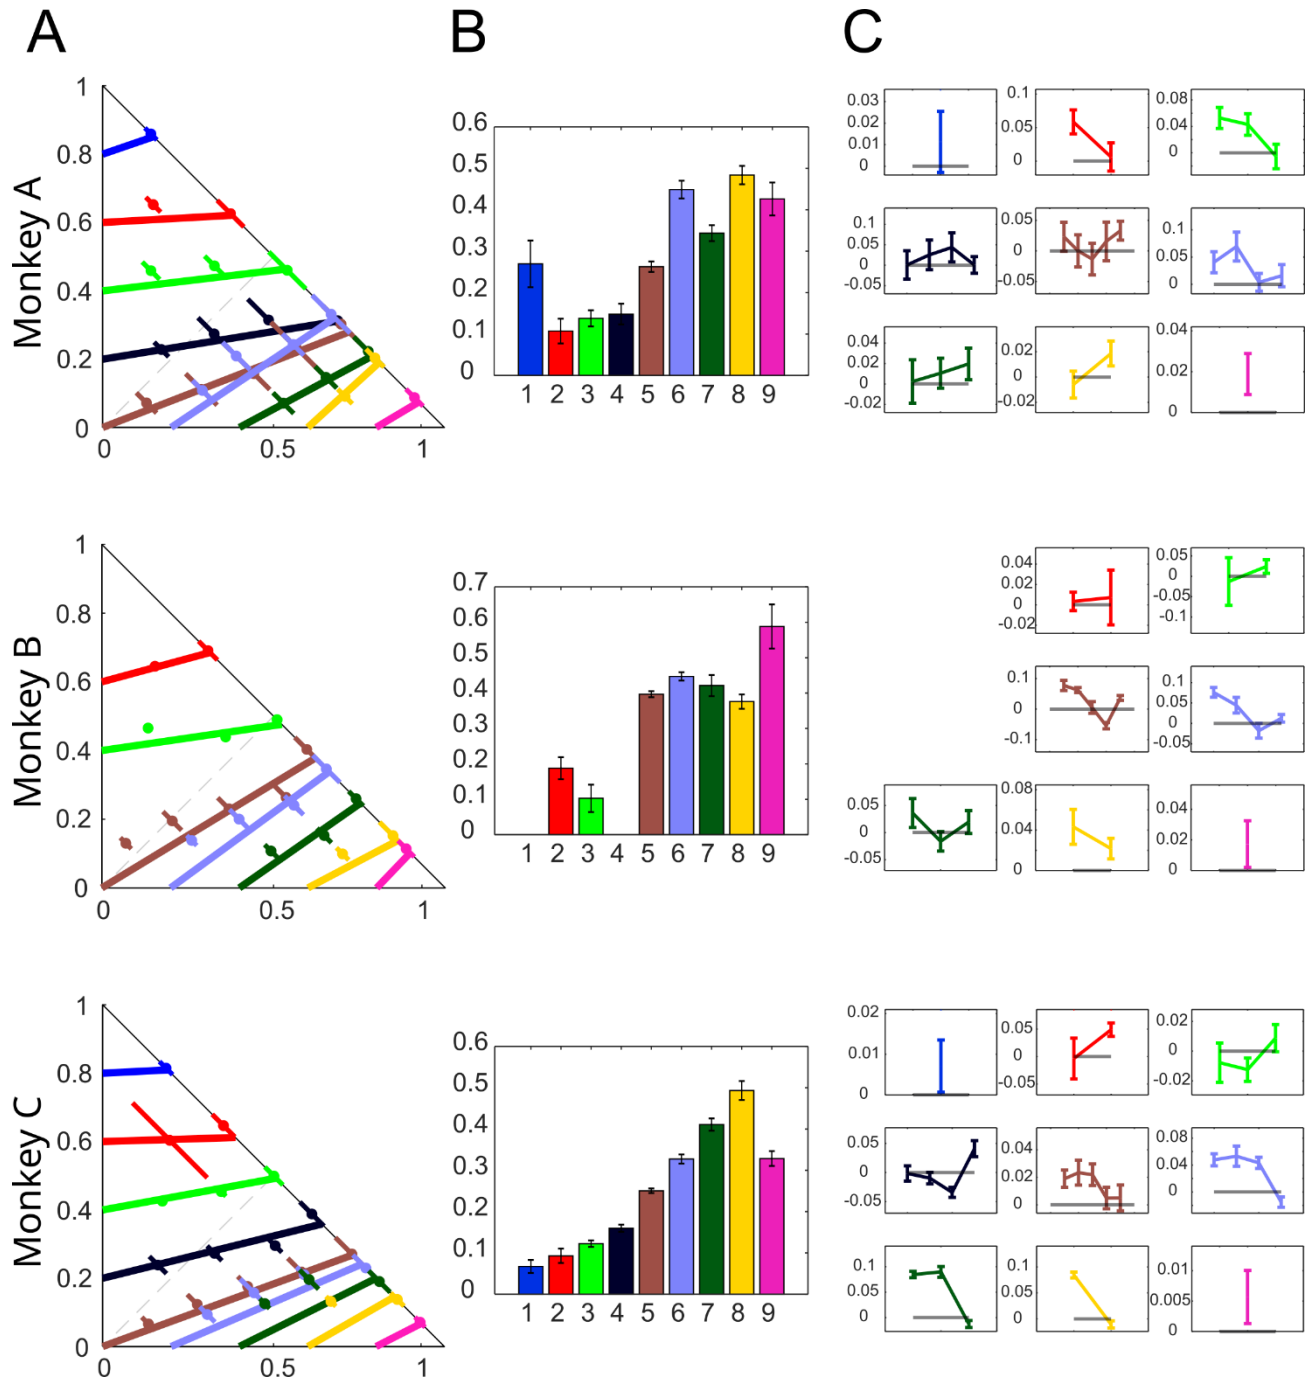

1184

1185

1186 **Supplementary Fig. 5.** Out-of-sample test for linearity and parallelism of indifference curves in the  
1187 Marschak-Machina triangle. (A) Indifference curves estimated with linear least-squares and out-of-  
1188 sample indifference points. Dots represent the mean of indifference points across all sessions (that  
1189 fall within the same indifference curve with the same color); lines show Standard Deviation (SD) of  
1190 IPs across all sessions. (B) Bar graphs showing significant differences in slope of the indifference  
1191 curves estimated with linear least-squares (mean  $\pm$  SEM; one-way ANOVA  $p < 0.001$  for all three  
1192 animals). The nine colors correspond to the nine indifference curves being tested. (C) Line plots  
1193 showing significant residuals between indifference points and estimated indifference curves (mean  
1194  $\pm$  SEM;  $p < 0.05$ ; one-sample t-test against indifference curves, represented by grey lines). The y-  
1195 axis represents the residuals (0 = same as estimated indifference curves), and the x-axis represents  
1196 the position of the indifference points in the Marschak-Machina triangle.
